# 1 **Structure of the Lifeact–F-actin complex**

2 Alexander Belyy<sup>1</sup>, Felipe Merino<sup>1,2</sup>, Oleg Sitsel<sup>1</sup> and Stefan Raunser<sup>1\*</sup>

3 <sup>1</sup>Department of Structural Biochemistry, Max Planck Institute of Molecular Physiology, Otto-Hahn-Str. 11, 44227 Dortmund,  
4 Germany

5 <sup>2</sup>Current address: Department of Protein Evolution, Max Planck Institute for Developmental Biology, Max-Planck-Ring 5,  
6 72076, Tübingen, Germany.

7 \*Correspondence should be addressed to: [stefan.raunser@mpi-dortmund.mpg.de](mailto:stefan.raunser@mpi-dortmund.mpg.de)

8

## 9 **Abstract**

10 Lifeact is a short actin-binding peptide that is used to visualize filamentous actin (F-actin)  
11 structures in live eukaryotic cells using fluorescence microscopy. However, this popular probe  
12 has been shown to alter cellular morphology by affecting the structure of the cytoskeleton. The  
13 molecular basis for such artefacts is poorly understood. Here, we determined the high-  
14 resolution structure of the Lifeact–F-actin complex using electron cryo-microscopy. The  
15 structure reveals that Lifeact interacts with a hydrophobic binding pocket on F-actin and  
16 stretches over two adjacent actin subunits, stabilizing the DNase I-binding loop of actin in the  
17 closed conformation. Interestingly, the hydrophobic binding site is also used by actin-binding  
18 proteins, such as cofilin and myosin and actin-binding toxins, such as TccC3HVR from  
19 *Photorhabdus luminescens* and ExoY from *Pseudomonas aeruginosa*. *In vitro* binding assays  
20 and activity measurements demonstrate that Lifeact indeed competes with these proteins,  
21 providing an explanation for the altering effects of Lifeact on cell morphology *in vivo*. Finally,  
22 we demonstrate that the affinity of Lifeact to F-actin can be increased by introducing mutations  
23 into the peptide, laying the foundation for designing improved actin probes for live cell  
24 imaging.

## 25 Introduction

26 The network of actin filaments in eukaryotic cells is involved in processes ranging from  
27 intracellular trafficking to cell movement, cell division and shape control (Pollard and Cooper,  
28 2009). It is therefore not surprising that much effort has been directed to characterize the actin  
29 cytoskeleton under both physiological and pathological conditions. Numerous actin-visualizing  
30 compounds were developed to enable this. These include small molecules, labelled toxins,  
31 recombinant tags, as well as actin-binding proteins and peptides (see (Melak et al., 2017) for a  
32 detailed review). However, using these molecules to study actin *in vivo* often alters the  
33 properties of actin filaments to such an extent that normal homeostasis of the cytoskeleton is  
34 impaired. Since these side effects cannot be avoided, it is important to know their molecular  
35 basis in order to be able to adequately interpret the experimental data.

36 Phalloidin and jasplakinolide are cyclic peptides derived from the death cap mushroom  
37 *Amanita phalloides* and marine sponge *Jaspis johnstoni* (Crews et al., 1986; Lynen and  
38 Wieland, 1938), respectively. They bind specifically to F-actin, and when fused to a fluorescent  
39 probe their derivatives allow visualization of the cell cytoskeleton by fluorescence microscopy  
40 (Melak et al., 2017). However, both molecules strongly stabilize F-actin and shift the cellular  
41 actin equilibrium, largely limiting their use in live cell imaging (Bubb et al., 2000; Dancker et  
42 al., 1975). Recent cryo-EM studies from our group and others have uncovered how phalloidin  
43 and jasplakinolide affect the structure of F-actin and described the potential limitations of their  
44 use (Mentes et al., 2018; Merino et al., 2018a; Pospich et al., 2019).

45 The development of various fluorescent proteins provided new ways of visualizing the  
46 actin cytoskeleton. A simple and popular technique compatible with live cell imaging is to  
47 express actin fused to GFP-like proteins (Ballestrem et al., 1998). However, such actin chimeras  
48 often interfere with the normal functionality of the cytoskeleton in a way that results in  
49 experimental artefacts (Aizawa et al., 1997; Nagasaki et al., 2017). An alternative to GFP-actin  
50 is to fuse GFP to actin-binding proteins, such as utrophin (Burkel et al., 2007; Lin et al., 2011)  
51 or *Arabidopsis* fimbrin (Sheahan et al., 2004) and synthetic affimers that bind actin (Kost et al.,  
52 1998; Lopata et al., 2018). These actin filament markers have been successfully used in a variety  
53 of cell types and organisms (Melak et al., 2017; Montes-Rodriguez and Kost, 2017; Spracklen  
54 et al., 2014).

55 The most recent development is an F-actin binding nanobody called Actin-Chromobody  
56 that claims to have a minimal effect on actin dynamics and no notable effect on cell viability  
57 (Schiavon et al., 2019). However, the binding of the Actin-Chromobody to actin has not yet  
58 been characterized at molecular level, leaving the true extent of possible side effects open.

59 As described above, fluorophore-bound proteins are large and bulky resulting in  
60 possible steric clashes when interacting with actin. To avoid these problems, small fluorophore-  
61 labeled peptides were developed. The most commonly used one is Lifeact, which is a 17 amino  
62 acid peptide derived from the N-terminus of the yeast actin-binding protein ABP140. In the  
63 original publication, Lifeact was described as a novel F-actin probe that does not interfere with  
64 actin dynamics *in vitro* and *in vivo* (Riedl et al., 2008). The same group later reported transgenic  
65 Lifeact-GFP expressing mice that were phenotypically normal and fertile (Riedl et al., 2010),  
66 and no influence of Lifeact on cellular processes was found under the published experimental  
67 conditions. Two other groups performed a direct comparison of various F-actin binding probes  
68 and confirmed the low influence of Lifeact on cell cytoskeletal architecture (Belin et al., 2014;  
69 Sliogeryte et al., 2016). Later on, however, several major Lifeact-caused artefacts were  
70 described: Lifeact was unable to stain certain F-actin rich structures (Munsie et al., 2009;  
71 Sanders et al., 2013), it disturbed actin assembly in fission yeast (Courtemanche et al., 2016),  
72 it caused infertility and severe actin defects in *Drosophila* (Spracklen et al., 2014), and altered  
73 cell morphology in mammalian cells (Flores et al., 2019). The existing explanatory hypothesis  
74 suggests that Lifeact induces a conformational change in F-actin that affects binding of cofilin  
75 and eventually impairs cell cytoskeletal dynamics (Courtemanche et al., 2016). However,  
76 despite the widespread usage of Lifeact, the validity of this hypothesis is still a matter of debate  
77 since no structure of Lifeact-decorated F-actin has been available.

78 In order to address this, we solved the structure of the Lifeact–F-actin complex using  
79 single particle cryo-EM. The 3.5 Å structure reveals that Lifeact binds to the two consecutive  
80 actin subunits of the same strand of the filament and displaces the DNase I-binding loop (D-  
81 loop) upon binding. The binding site overlaps with that of cofilin and myosin, suggesting that  
82 artefacts in live-cell imaging are caused by competition between these proteins and Lifeact.  
83 Competition binding assays *in vitro* prove that this is indeed the case. Furthermore, we show  
84 that the binding of Lifeact to F-actin considerably reduces the *in vivo* toxicity of the actin-  
85 modifying toxin TccC3HVR from *Photobacterium luminescens*. Our data will help to predict  
86 potential artefacts in experiments using Lifeact, and will serve as a strong basis for developing  
87 new actin-binding probes with improved properties.

## 88 Results and Discussion

### 89 Structure of the Lifact–F-actin complex

90 Based on previous studies (Mentes et al., 2018; Merino et al., 2018b; Pospich et al., 2019), we  
91 know that phalloidin stabilizes actin filaments. When it is added during polymerization, the  
92 nucleotide binding pocket is occupied with an ADP and  $P_i$  and the D-loop is in the open  
93 conformation (Pospich et al., 2019). We therefore polymerized actin in the presence of  
94 phalloidin and added an excess of Lifact to the formed filaments in order to fully decorate the  
95 filaments with Lifact. We then determined the structure of this complex by cryo-EM (Fig. 1,  
96 Table 1). The average resolution of the reconstruction was 3.5 Å, with local areas reaching 3.0  
97 Å (Fig. S1), which allowed us to build an atomic model in which we could position most of the  
98 side chains. We could clearly identify densities corresponding to ADP,  $Mg^{2+}$  and  $P_i$  in the  
99 nucleotide-binding pocket of actin (Fig. 1A) and a density corresponding to phalloidin at the  
100 expected position (Mentes et al., 2018; Merino et al., 2018a; Pospich et al., 2019) in the center  
101 of the filament (Fig. 1A). Lifact was well resolved and we could unambiguously fit 16 out of  
102 17 amino acids into the density (Fig. 1, Fig. S2).

103 The peptide folds as an  $\alpha$ -helix and spans two consecutive actin subunits of the same  
104 strand of the filament (Fig. 1A, B). The binding pocket is formed by the tip of the D-loop of the  
105 lower subunit (M47) and SD1 of the upper subunit, where the N-terminal region of Lifact is  
106 almost locked in by the protruding D25 of actin (Fig. 1B). Although Lifact is in general a  
107 hydrophilic peptide, it contains a hydrophobic patch formed by the side chains of V3, L6, I7,  
108 F10 and I13 which all orient to one side. This hydrophobic patch interacts with a hydrophobic  
109 groove on the surface of F-actin which comprises M44, M47, Y143, I345 and L349. F10 of  
110 Lifact is deeply buried in this pocket (Fig. 1C). Interestingly and contrary to what we have  
111 seen before in samples co-polymerized with phalloidin (Pospich et al., 2019), the D-loop is in  
112 its closed conformation (Fig. S3). A comparison between the Lifact-F-actin-ADP- $P_i$  -  
113 phalloidin- structure with that of phalloidin-stabilized F-actin-ADP- $P_i$  (Pospich et al., 2019)  
114 shows that direct interactions between Lifact and the D-loop of F-actin are only possible if the  
115 D-loop is in its closed conformation (Movie S1). Specifically, I13 of Lifact interacts with M47  
116 of F-actin, stabilizing the closed D-loop conformation in F-actin. This suggests that Lifact has  
117 a higher affinity to F-actin-ADP, where the D-loop is in the closed conformation, than to  
118 phalloidin-stabilized F-actin-ADP- $P_i$ , where the D-loop has to be first moved from the open to  
119 the closed conformation. Indeed, Kumari *et al.* (Kumari et al., 2019) showed in a  
120 complementary study that the affinity of Lifact is three to four times higher for F-actin-ADP  
121 compared to F-actin-ADP- $P_i$ .

122

### 123 **Properties of the interaction site**

124 Guided by the insights gained from our structure, we mutated different residues at the peptide-  
125 actin interface to study the binding properties of Lifeact in more detail. We chose to use  
126 *Saccharomyces cerevisiae* for these studies since actin mutagenesis can be easily and rapidly  
127 performed in this organism. To avoid toxicity from artificial overexpression of Lifeact, we  
128 expressed Lifeact-mCherry under the promoter of the actin binding protein ABP140 from  
129 which Lifeact was originally derived, and then performed confocal microscopy experiments to  
130 visualize Lifeact-actin interaction.

131 When expressing WT Lifeact-mCherry, we observed the typical patch morphology of  
132 actin-rich structures that are distinct from the diffuse background of Lifeact-mCherry. These  
133 actin-rich patches can also be observed when the cells are stained by fluorescently-labelled  
134 phalloidin (Fig. 2A). However, when L6 was mutated to lysine, or F10 to alanine, we did not  
135 observe these structures and Lifeact-mCherry was homogeneously distributed in the cells.  
136 Although the I13A variant displayed some of the patches, they were significantly less abundant  
137 than with WT Lifeact-mCherry (Fig. 2A, B). While the Lifeact L6K mutant introduces a charge  
138 in the hydrophobic patch, Lifeact mutants F10A and I13A retain the hydrophobicity but change  
139 the surface structure of the peptide. Since all mutations impaired the interaction between actin  
140 and Lifeact, we conclude that hydrophobicity as well as shape complementarity are important  
141 for efficient Lifeact binding to F-actin.

142 Our structure suggests that actin D25 acts as an N-terminal cap for the helix of Lifeact  
143 and a mutation of actin D25 to tyrosine would affect this interaction and mutating L349 of actin  
144 to methionine would impair its crucial interaction with Lifeact F10. Indeed, actin-rich structures  
145 were also absent when Lifeact-mCherry was expressed in cells with the D25Y or the L349M  
146 actin variant (Fig. 2C, D), indicating that actin D25 and Lifeact F10 are important for Lifeact  
147 binding.

148 To study the effect of Lifeact WT and variants on yeast viability we overexpressed  
149 Lifeact-MBP fusions under a strong galactose promoter and analyzed their toxicity in a yeast  
150 growth phenotype assay. Consistent with a previously reported study (Courtemanche et al.,  
151 2016), we observed that the overexpression of Lifeact-MBP caused cell toxicity (Fig. 2E).  
152 However, mutagenesis of I13 to alanine improved, and L6 to lysine and F10 to alanine fully  
153 restored yeast growth. Altogether, these results demonstrate the importance of shape  
154 complementarity as well as hydrophobicity at the Lifeact-actin interface.

155

## 156 **Lifeact mutations increase its affinity to F-actin**

157 Despite these specific interactions between Lifeact and F-actin, the peptide binds to F-actin  
158 only with micromolar affinity (Riedl et al., 2008). A higher affinity would provide a stronger  
159 signal-to-noise ratio, decreasing the background during live imaging, and allowing lower  
160 expression levels of the peptide to be used during such experiments. We therefore attempted to  
161 increase the affinity of Lifeact to F-actin by structure-guided *in silico* design using  
162 RosettaScripts (Fleishman et al., 2011) based on our atomic model. The simulation output  
163 suggested several possible mutations after residue 12 of Lifeact (Fig. 3A). The mutation E16R  
164 was especially promising. It was predicted to add an additional interaction with the D-loop and  
165 an electrostatic interaction with E167 of actin (Fig. 3B). Indeed, this variant showed an  
166 increased affinity for F-actin as judged by cosedimentation assays (Fig. 3C, D). Although we  
167 could not observe density for E17 of Lifeact in our density map, we also created and tested a  
168 E17K variant of Lifeact which should similarly create an additional interaction with E167 of  
169 actin and thereby increase the affinity of the peptide. In line with the prediction, E17K Lifeact-  
170 MBP variants showed an increased affinity for F-actin (Fig. 3C, D). Together, these  
171 modifications show that based on our atomic model, Lifeact can be optimized by mutations to  
172 increase its binding to actin.

173

## 174 **Lifeact competes with cofilin and myosin**

175 Several studies demonstrated that Lifeact staining interfered with cofilin binding to actin. It was  
176 shown that Lifeact does not bind to cofilin-bound F-actin in cells (Munsie et al., 2009) and  
177 Lifeact-expressing cells possess longer and thicker stress fibers. Studies by Flores *et al.* (Flores  
178 et al., 2019) suggested that reduced cofilin binding to F-actin is the underlying cause of the  
179 observed Lifeact-induced artefacts. Similarly, Lifeact caused changes in endocytosis and  
180 cytokinesis of *Schizosaccharomyces pombe*, which were attributed to reduced cofilin  
181 interaction with actin (Courtemanche et al., 2016). The authors of that study proposed that  
182 cofilin and Lifeact bind to different regions of F-actin, and suggested that binding of one of  
183 these proteins impairs binding of the other by provoking a conformational change in F-actin  
184 (Courtemanche et al., 2016).

185         Apart from Lifeact-induced stabilization of the closed conformation of the D-loop,  
186 however, our structure does not show major differences to previously reported structures of F-  
187 actin (Merino et al., 2018b; Pospich et al., 2019). Therefore, a conformational change in F-actin  
188 cannot be the cause for the effect of Lifeact. When comparing our F-actin–Lifeact structure  
189 with that of F-actin–cofilin (Tanaka et al., 2018), it becomes obvious that the binding site of

190 cofilin overlaps with that of Lifeact (Fig. 4A). Notably, the same is true for myosin, which  
191 interacts with the same position on the actin surface (Fig. 4B) (Ecken et al., 2016). We therefore  
192 performed *in vitro* competition actin binding assays with human cofilin-1, the motor domain of  
193 human non-muscle myosin 2C isoform (NM2C), and Lifeact. Lifeact successfully decreased  
194 cofilin and myosin binding in a dose-dependent manner (Fig. 4C-F). As a negative control, we  
195 performed a similar competition assay with tropomyosin that binds to a different region of actin  
196 (Fig. 4G) (Ecken et al., 2015), and the Lifeact F10A mutant which only binds weakly to F-actin  
197 (Fig. 4C-F). As expected, the addition of Lifeact did not affect tropomyosin binding to F-actin  
198 (Fig. 4H, I), nor could F10A Lifeact compete with cofilin-1 or NM2C (Fig. 4C-F). Based on  
199 our structural and functional data, we demonstrate that the morphological artefacts described  
200 for Lifeact are not due to a conformational change in actin but are caused by competition for  
201 the same binding site on F-actin of Lifeact with actin-binding proteins, such as cofilin and  
202 myosin.

203

#### 204 **Lifeact impairs the activity of bacterial toxins**

205 In our laboratory, we study two bacterial toxins that interact with F-actin. One is *Pseudomonas*  
206 *aeruginosa* ExoY, a toxin that becomes a potent nucleotidyl cyclase upon interaction with F-  
207 actin (Belyy et al., 2016). After activation, the toxin generates a supraphysiologic amount of  
208 cGMP and cAMP that impedes cell signaling. It was previously demonstrated that the  
209 mutagenesis of D25 in actin abolishes ExoY binding to F-actin (Belyy et al., 2018). The same  
210 actin mutation also prevents Lifeact binding, we therefore hypothesize that Lifeact and ExoY  
211 have overlapping binding sites.

212 The second toxin is the 30 kDa C-terminal fragment of *Photobacterium luminescens*  
213 TccC3 (TccC3HVR), which is the effector domain of the large Tc toxin complex PTC3. Once  
214 it is translocated into the cell by the injection machinery of PTC3, TccC3HVR acts as an ADP-  
215 ribosyltransferase that modifies actin at T148 (Lang et al., 2010). This leads to uncontrolled  
216 actin polymerization, clustering, and finally to cell death due to cytoskeletal collapse. T148 is  
217 located in close proximity to the Lifeact binding site, therefore the actin binding site of  
218 TccC3HVR and Lifeact might overlap.

219 To understand whether Lifeact competes with the binding of ExoY, we first performed  
220 a cosedimentation assay with ExoY, F-actin and different concentrations of Lifeact. In  
221 agreement with our hypothesis, we observed a decrease of ExoY binding to F-actin in the  
222 presence of Lifeact while the Lifeact F10A mutant did not impair formation of the ExoY-F-  
223 actin complex (Fig. 5A, B).

224 We then ADP-ribosylated F-actin by TccC3HVR in the presence of Lifeact. In our  
225 experimental setup, 3  $\mu$ M of WT Lifeact was already sufficient to decrease the level of ADP  
226 ribosylation by a factor of two, while in the control reaction 100  $\mu$ M of F10A Lifeact did not  
227 decrease the level of ADP-ribosylation at all (Fig. 5C, D). This experiment strongly supports  
228 the hypothesis that TccC3HVR and Lifeact bind to the same region of F-actin.

229 Encouraged by these *in vitro* results, we decided to test whether expressing Lifeact in  
230 mammalian cells would protect them from the TccC3HVR toxin. We therefore expressed either  
231 mCherry-tagged WT Lifeact, Lifeact F10A, Lifeact E17K, or mCherry-tagged actin as a  
232 negative control in adherent HEK 293T cells. We then intoxicated the cells with PTC3 and  
233 observed the effect of the injected TccC3HVR. Our control cells expressing actin and cells  
234 expressing the F-actin binding-incompetent F10A Lifeact showed rapid cytoskeletal collapse  
235 and accompanying overall shrinkage (Fig. 5E, F). However, the toxic effect of TccC3HVR was  
236 significantly reduced in cells that expressed WT Lifeact or the binding-competent E17K  
237 mutant. Thus, Lifeact has anti-toxin properties and despite its effects on the cytoskeleton, it has  
238 the potential to be used as a precursor for the development of anti-toxin drugs.

239

## 240 Conclusions

241 In this study we determined the binding site of Lifeact on F-actin and demonstrated that this  
242 peptide directly competes with actin-binding proteins such as cofilin and myosin, providing an  
243 explanation for how Lifeact alters cell morphology. In addition, we demonstrate how the  
244 affinity of Lifeact can be modulated by site directed mutagenesis in order to create Lifeact-  
245 based probes with modified properties. Our results have strong implications for the usage of  
246 Lifeact as an actin filament label in fluorescent light microscopy and provide cell biologists  
247 with the background information that is needed to make a properly informed decision on  
248 whether to use Lifeact in an experiment. Furthermore, we have demonstrated that Lifeact  
249 competes with actin-binding toxins such as ExoY and TccC3HVR, and partially counteracts  
250 the intoxication of cells by PTC3 toxin. This paves the way for the development of Lifeact-  
251 based anti-toxin drugs.



## 252 Materials and methods

### 253 Plasmids, bacteria and yeast strains, growth conditions

254 The complete list of used oligonucleotides, constructions and strains can be found in the  
255 Supplementary data. *E. coli* strains were grown in LB medium supplemented with ampicillin  
256 (100 µg/ml) or kanamycin (50 µg/ml). *S. cerevisiae* were grown on rich YPD medium or on  
257 synthetic defined medium (Yeast nitrogen base, Difco) containing galactose or glucose and  
258 supplemented if required with uracil, histidine, leucine, tryptophan, or adenine. *S. cerevisiae*  
259 strains were transformed using the lithium-acetate method (Daniel Gietz and Woods, 2002).  
260 Yeast actin mutagenesis was performed as described previously (Belyy et al., 2015). Yeast  
261 viability upon Lifeact-MBP overexpression under the galactose promoter was analyzed by a  
262 drop test: 5-fold serial dilutions of cell suspensions were prepared from overnight agar cultures  
263 by normalizing OD<sub>600</sub> measurements, then spotted onto agar plates and incubated for 2-3 days  
264 at 30 °C. Analysis of protein expression in yeast was performed following the described  
265 protocol (Kushnirov, 2000): yeast cells were grown in liquid galactose-containing medium  
266 overnight at 30 °C. Cells corresponding to 1 ml of OD<sub>600</sub> 1.0 were washed with 0.1 M NaOH,  
267 resuspended in 50 µl of 4-fold Laemmli sample buffer, and boiled for 5 minutes at 95 °C. 5 µl  
268 of the extracts were separated by SDS-PAGE, followed by Western blotting analysis and  
269 incubation with anti-MBP (NEB), anti-actin (C4, Abcam) or anti-RPS9 serum (polyclonal  
270 rabbit antibodies were a generous gift of Prof. S. Rospert).

271

### 272 Protein expression and purification

273 Fusion proteins of Lifeact variants or *Pseudomonas aeruginosa* ExoY toxin and maltose-  
274 binding protein (MBP) were purified from *E. coli* BL21-CodonPlus(DE3)-RIPL cells harboring  
275 the corresponding plasmids (2489 pB502 WT Lifeact-MBP, 2490 pB506 E16R Lifeact-MBP,  
276 2491 pB524 E17K Lifeact-MBP, 2479 pB386 MBP-ExoY). A single colony was inoculated in  
277 100 ml of LB media and grown at 37 °C. At OD<sub>600</sub> 1.0 protein expression was induced by  
278 addition of IPTG to a final concentration of 1 mM. After 2 h of expression at 37 °C, the cells  
279 were harvested by centrifugation, resuspended in buffer A (20 mM Tris pH 8, 500 mM NaCl),  
280 and lysed by sonication. The soluble fraction was applied on buffer A-equilibrated Protino Ni-  
281 IDA resin (Macherey-Nagel), washed, and eluted by buffer A, supplemented with 250 mM  
282 imidazole. Finally, the eluates were dialyzed against buffer B (20 mM Tris pH 8, 150 mM  
283 NaCl) and stored at -20 °C.

284 Rabbit skeletal muscle  $\alpha$ -actin was purified as described previously (Merino et al.,  
285 2018b) and stored in small aliquots at -80 °C.

286 Human cofilin-1 was purified from *E. coli* cells using previously described method  
287 (Carlier et al., 1997). In short, Rosetta DE3 *E. coli* cells were transformed with the 1855  
288 plasmid. An overnight culture derived from a single colony was diluted into 2 L of LB media  
289 to OD<sub>600</sub> 0.06 and grown at 37 °C. When OD<sub>600</sub> reached 0.7, the cells were cooled to 30 °C and  
290 cofilin expression was induced by adding IPTG to a final concentration of 0.5 mM. After 4 h  
291 of expression, the cells were harvested by centrifugation, resuspended in buffer C (10 mM Tris  
292 pH 7.8, 1 mM EDTA, 1 mM PMSF and 1 mM DTT), and lysed using a fluidizer. The soluble  
293 fraction of the lysate was dialyzed overnight in buffer D (10 mM Tris pH 7.8, 50 mM NaCl,  
294 0.2 mM EDTA and 2 mM DTT), and cleared by centrifugation. Then, the lysate was applied  
295 onto DEAE resin and washed with buffer D. Cofilin-containing fractions of the flow-through  
296 were collected and dialyzed against buffer E (10 mM PIPES pH 6.5, 15 mM NaCl, 2 mM DTT  
297 and 0.2 mM EDTA). After centrifugation, the protein was loaded onto Mono S cation exchange  
298 column and eluted by a linear gradient of 15 mM to 1 M NaCl in buffer E. Cofilin-containing  
299 fractions were concentrated to 10 mg/ml and stored at -80 °C.

300 Human tropomyosin was purified from *E. coli* BL21(DE3) cells transformed with a  
301 1609 plasmid using the previously described method (Coulton et al., 2006) with minor  
302 modifications. In brief, an overnight culture derived from a single colony was diluted into 5 L  
303 of LB media to OD<sub>600</sub> 0.06 and grown at 37 °C. When the OD<sub>600</sub> reached 0.5, the cells were  
304 cooled down to 20 °C and recombinant protein expression was induced by adding IPTG to a  
305 final concentration of 0.4 mM. After overnight protein expression, the cells were harvested by  
306 centrifugation, resuspended in buffer F (20 mM Tris pH 7.5, 100 mM NaCl, 5 mM MgCl<sub>2</sub>, 2  
307 mM EGTA and Roche cOmplete protease inhibitor) and lysed by fluidizer. The soluble fraction  
308 of the lysate was heated for 10 minutes at 80 °C, then cooled down to 4 °C and centrifuged.  
309 The supernatant was mixed 1:1 with buffer H (20 mM sodium acetate buffer pH 4.5, 100 mM  
310 NaCl, 5 mM MgCl<sub>2</sub> and 2 mM EGTA). The precipitate was collected and incubated for 1 h  
311 with buffer I (10 mM Bis-Tris pH 7, 100 mM NaCl). The renatured protein was applied to a  
312 HiTrap Q anion exchange column and eluted by a linear gradient of 100 mM to 1 M NaCl in  
313 buffer I. Tropomyosin-containing fractions were pooled and stored at -80 °C.

314 The motor domain of non-muscular myosin-2C (MYH14, isoform 2 from *H. sapiens*)  
315 consisting of amino acids 1–799 was purified as described previously (Ecken et al., 2016)  
316 Tcc3HVR, the ADP-ribosyltransferase domain of the *Photobacterium luminescens* TccC3  
317 protein (amino acids 679 - 960) was purified as described previously (Roderer et al., 2019).  
318 The TcdA1 and TcdB1-TccC3 components of the *Photobacterium luminescens* PTC3 toxin were  
319 expressed and purified as described previously (Gatsogiannis et al., 2016).

320

### 321 **Cryo-EM sample preparation, data acquisition, and processing**

322 Actin was polymerized by incubation in F-buffer in the presence of a twofold molar excess of  
323 phalloidin for 30 minutes at room temperature and further overnight at 4 °C. The next day, actin  
324 filaments were pelleted using a TLA-55 rotor for 30 minutes at 150.000 g at 4 °C and  
325 resuspended in F-buffer. 5 minutes before plunging, F-actin was diluted to 6 µM and mixed  
326 with 200 µM Lifeact peptide (the peptide of sequence MGVADLIKKAESISKEE with C-  
327 terminal amide modification was provided by Genosphere with >95% purity. The peptide was  
328 dissolved in 10 mM Tris pH 8). To improve ice quality, Tween-20 was added to the sample to  
329 a final concentration of 0.02% (w/v). Plunging was performed using the Vitrobot Mark IV  
330 system (Thermo Fisher Scientific) at 13 °C and 100% humidity: 3 µl of sample were applied  
331 onto a freshly glow-discharged copper R2/1 300 mesh grid (Quantifoil), blotted for 8 s on both  
332 sides with blotting force -20 and plunge-frozen in liquid ethane.

333 The dataset was collected using a Talos Arctica transmission electron microscope  
334 (Thermo Fisher Scientific) equipped with an XFEG at 200 kV using the automated data-  
335 collection software EPU (Thermo Fisher Scientific). Two images per hole with defocus range  
336 of -0.6 - -3.35 µm were collected with the Falcon III detector (Thermo Fisher Scientific)  
337 operated in linear mode. Image stacks with 40 frames were collected with total exposure time  
338 of 3 sec and total dose of 60 e<sup>-</sup>/Å. 1415 images were acquired and 915 of them were further  
339 processed. Filaments were automatically selected using crYOLO (Wagner et al., 2019).  
340 Classification, refinement and local resolution estimation were performed in SPHIRE (Moriya  
341 et al., 2017). Erroneous picks were removed after a round of 2D classification with ISAC. After  
342 removing bad particles, further segments were removed to ensure that each filament consists of  
343 at least 5 members. After 3D refinement, particles were polished using Bayesian polishing  
344 routine in Relion (Zivanov et al., 2018) and refined once again within SPHIRE.

345

### 346 **Model building and design**

347 We used the structure of actin in complex with ADP-Pi (PDBID 6FHL) as starting model for  
348 the filament, and built a *de novo* model of the Lifeact peptide using Rosetta's fragment-based  
349 approach (Wang et al., 2015). Since one residue of Lifeact is missing from the density, we  
350 threaded the sequence in all possible registers – including the reverse orientations – and  
351 minimized them in Rosetta. The solution starting from M1 with the N-terminus pointing  
352 towards the pointed end was clearly better than all the others (Fig. S2). A set of restraints for  
353 phalloidin were built with eLBOW (Moriarty et al., 2009) and the toxin was manually fit into

354 the density with Coot (Emsley et al., 2010). The model was further refined using iterative  
355 rounds of Rosetta's fragment-based iterative refinement (DiMaio et al., 2015), and manual  
356 building with Coot and ISOLDE (Croll, 2018; Emsley et al., 2010). The model was finally  
357 refined within Phenix (Liebschner et al., 2019) to fit B-factors and correct the remaining  
358 geometry errors.

359 We used RosettaScripts (Fleishman et al., 2011) to design a version of Lifeact with improved  
360 affinity. The input protocol and starting files are available upon request. The figures were made  
361 using UCSF Chimera (Pettersen et al., 2004).

362

### 363 **Yeast confocal microscopy**

364 Yeast cells bearing plasmids that encode Lifeact-mCherry variants under the native ABP140  
365 promoter and terminator, were grown overnight on a liquid synthetic defined medium (Yeast  
366 nitrogen base, Difco) supplemented with glucose. On the following day, the cultures were  
367 diluted to OD<sub>600</sub> 0.5 using fresh media, incubated for 2-3 h at 30 °C and centrifuged at 6,000 g.  
368 The cell pellet was washed twice with PBS buffer, fixed by 4% formaldehyde for 20 minutes  
369 at room temperature, washed once with PBS buffer and stained with the ActinGreen 488 probe  
370 (Invitrogen). After 30 minutes incubation with the probe at room temperature, the cells were  
371 washed twice in PBS and applied to concanavalin A-coated glass bottom Petri dishes. Image  
372 acquisition was performed with a Zeiss LSM 800 confocal laser scanning microscope, equipped  
373 with 63X 1.4 DIC III M27 oil-immersion objective and two lasers with wavelengths of 488 and  
374 561 nm. To avoid experimental bias, we measured the weighted colocalization coefficient of  
375 phalloidin with Lifeact-mCherry in 15 cells of each strain using ZEN software.

376

### 377 **Cosedimentation assays**

378 F-actin was prepared as follows. An aliquot of freshly thawed G-actin was centrifuged at  
379 150,000 g using a TLA-55 rotor for 30 minutes at 4 °C to remove possible aggregates. Then,  
380 actin was polymerized by incubation in F-buffer (120 mM KCl, 20 mM Tris pH 8, 2 mM MgCl<sub>2</sub>,  
381 1 mM DTT and 1 mM ATP) for 2 h at room temperature or overnight at 4 °C. For the  
382 cosedimentation experiments with myosin, actin was polymerized in the presence of a twofold  
383 molar excess of phalloidin. After polymerization, actin filaments were pelleted using a TLA-  
384 55 rotor at 150,000 g for 30 minutes and resuspended in the following buffers: F-buffer was  
385 used for cosedimentations with tropomyosin or Lifeact-MBP fusion proteins; 20 mM HEPES  
386 pH 6.5, 50 mM KCl, 2 mM MgCl<sub>2</sub> was used for cosedimentations with cofilin; 120 mM KCl,  
387 20 mM Tris pH 8, 2 mM MgCl<sub>2</sub>, 1 mM DTT was used for cosedimentations with myosin.

388 Cosedimentation assays were performed in 20  $\mu$ l volumes by first incubating F-actin with the  
389 specified proteins for 5 minutes at room temperature, then centrifuging at 150,000 g using the  
390 TLA-55 or TLA120.1 rotor for 30 minutes at 4 °C. For the competition assays, Lifeact peptide  
391 was added to the mixture at the specified concentrations. After centrifugation, aliquots of the  
392 supernatant and resuspended pellet fractions were separated by SDS-PAGE using 4-15%  
393 gradient TGX gels (Bio-Rad) and analyzed by densitometry using Image Lab software (Bio-  
394 Rad).

395

#### 396 **ADP-ribosylation of actin by TccC3HVR**

397 8  $\mu$ l mixtures of 1  $\mu$ g (2.4  $\mu$ M) actin and Lifeact peptide at specified concentrations were pre-  
398 incubated for 5 minutes at room temperature in TccC3 buffer (1 mM NAD, 20 mM Tris pH 8,  
399 150 mM NaCl and 1 mM MgCl<sub>2</sub>). The ADP-ribosylation reaction was initiated by addition of  
400 0.02  $\mu$ g (61 pM) of TccC3HVR into the mixture. After 10 minutes of incubation at 37 °C, the  
401 reaction was stopped by adding Laemmli sample buffer and heating the sample at 95 °C for 5  
402 minutes. Components of the mixture were separated by SDS-PAGE, blotted onto a PVDF  
403 membrane using a Trans-Blot Turbo transfer system (Bio-Rad) and visualized using a  
404 combination of anti-mono-ADP-ribose binding reagent (Merck) and anti-rabbit-HRP antibody  
405 (Bio-Rad). The level of actin ADP-ribosylation was quantified by densitometry using Image  
406 Lab software (Bio-Rad).

407

#### 408 **Confocal microscopy of mammalian cells and the *in vivo* intoxication competition assay**

409 0.05 x 10<sup>6</sup> HEK 293T cells were seeded in 35 mm glass-bottom, poly-L-lysine coated Petri  
410 dishes in 2 mL DMEM/F12 + 10% FBS media and grown for 24 h in a 5% CO<sub>2</sub> atmosphere at  
411 37 °C. The cells were then transfected with mCherry fusions of actin or Lifeact variants using  
412 the FuGENE transfection reagent (Promega). The cells were grown for a further 24 h and  
413 transferred to an LSM 800 microscope (Zeiss) equipped with a C-Apochromat 40x/1.2 W  
414 objective and maintained in a 5% CO<sub>2</sub> atmosphere at 37 °C. Images were acquired using the  
415 Airyscan detector and a 561 nm laser wavelength for excitation. After taking the first image (0  
416 h), 300 pM PTC3 was added (pre-formed by mixing purified TcdA1 and TcdB2-TccC3 in a 5:1  
417 molar ratio). Images were taken at 10-minute intervals for 5 h.

418 The images were processed in Fiji (Schindelin et al., 2012). The cells were selected by applying  
419 a threshold on the red fluorescence channel, then their areas were measured, normalized to the  
420 original cell area at the 0 h time point, and the resulting % change in cell area that occurred  
421 during the experiment was plotted.

422 Three independent experiments for each construct were performed. The cells were not tested  
423 for *Mycoplasma* contamination.  
424

## 425 Figure legends

426 **Figure 1. Cryo-EM structure of the Lifeact-F-actin-ADP-P<sub>i</sub>-phalloidin complex.** **A:** The  
427 3.5 Å resolution map of the Lifeact-F-actin-ADP-P<sub>i</sub>-phalloidin complex shows a defined  
428 density for phalloidin (cyan), ADP-P<sub>i</sub> (gold) and the Lifeact peptide (green). The central subunit  
429 of actin is colored in orange while its surrounding four neighbors are shown in red. **B:** Atomic  
430 model of the interface between Lifeact and F-actin. **C:** Surface of the atomic model of F-actin  
431 colored according to its hydrophobicity. Hydrophobicity increases as the color scale goes from  
432 white to gold. The inset highlights the hydrophobic nature of the Lifeact-binding surface.

433  
434 **Figure 2. The Lifeact–F-actin complex is affected by point mutations.** **A, C:** Confocal  
435 microscopy images of yeast cells expressing Lifeact-mCherry variants in a WT actin  
436 background (**A**) and WT Lifeact-mCherry in yeast with different actin variants (**C**). Actin was  
437 additionally stained with fluorescently labeled phalloidin (ActinGreen 488). Representative  
438 areas where yeast cells are stained with both fluorophores are shown. Note that for our  
439 experiments we used the previously described D25Y/D222G double mutant of yeast actin  
440 (Belyy et al., 2016). However, D222 is located in subdomain IV and is therefore unlikely to  
441 play a role in the Lifeact–F-actin interaction. Scale bars, 5 μm. **B, D:** Calculated weighted  
442 colocalization coefficients of phalloidin with Lifeact-mCherry from 15 yeast cells from two  
443 independent experiments with five micrographs each, corresponding to (**A**) and (**C**),  
444 respectively. For statistical analysis, the paired *t* test was used. \*\*\* *p* < 0.001. The error bars in  
445 the panels correspond to standard deviations of three independent experiments. **E:** Growth  
446 phenotype assay with yeast overexpressing Lifeact-MBP variants under a strong galactose  
447 promoter. The top image marked “Glucose” corresponds to experimental conditions with low  
448 Lifeact expression. The central image marked “Galactose” corresponds to experimental  
449 conditions with high Lifeact expression. The lower image is a Western blot of cells grown on  
450 galactose-containing media performed using anti-MBP, anti-actin and anti-RPS9 antibodies.

451  
452 **Figure 3. Lifeact sequence design.** **A:** Frequency of amino acids in the top 100 designs  
453 produced by Rosetta. **B:** Predicted structure of the E16R mutant. The wild-type structure is  
454 included for comparison. **C:** Cosedimentation of F-actin and 1 μM Lifeact-MBP proteins  
455 detected by SDS-PAGE. The upper band corresponds to Lifeact-MBP, and the lower band  
456 corresponds to actin. sup, supernatant; pel, pellet. A representative stain-free gel is shown. **D:**  
457 The fractions of Lifeact-MBP that cosedimented with F-actin were quantified by densitometry

458 and plotted versus actin concentrations. The error bars in panel **D** correspond to standard  
459 deviations of three independent experiments.

460

461 **Figure 4. Lifeact competes with cofilin and myosin *in vitro*.** **A, B, G:** Structural models of  
462 the **(A)** cofilin–F-actin (PDB 5YU8) (Tanaka et al., 2018), **(B)** myosin–F-actin (PDB 5JLH)  
463 (Ecken et al., 2016) and **(G)** tropomyosin–F-actin (3J8A) (Ecken et al., 2015) complexes. **C:**  
464 SDS-PAGE analysis of cosedimentation experiments of F-actin (3  $\mu$ M, upper band) with cofilin  
465 (3  $\mu$ M, lower band) in the presence of the indicated amounts of Lifeact. A representative stain-  
466 free gel is shown. **E:** SDS-PAGE analysis of cosedimentation experiments of F-actin (0.7  $\mu$ M,  
467 lower band) with myosin (0.5  $\mu$ M, upper band) in the presence of the indicated amounts of  
468 Lifeact. A representative stain-free gel is shown. **H:** SDS-PAGE analysis of cosedimentation  
469 experiments of F-actin (3  $\mu$ M, lower band) with tropomyosin (3  $\mu$ M, upper band) in the  
470 presence of the indicated amounts of Lifeact. A representative Coomassie stained gel is shown.  
471 The fractions of cofilin, myosin and tropomyosin that co-sedimented with F-actin in the  
472 corresponding experiments were quantified by densitometry and plotted against Lifeact  
473 concentrations at **D, F** and **I**, respectively. The error bars in **D, F** and **I** correspond to standard  
474 deviations of three independent experiments. sup, supernatant; pel, pellet.

475

476 **Figure 5. Lifeact impairs the activity of F-actin binding bacterial toxins.** **A:** SDS-PAGE  
477 analysis of cosedimentation experiments of F-actin (1  $\mu$ M, lower band) with ExoY-MBP (1  
478  $\mu$ M, upper band) in the presence of the indicated amounts of Lifeact. sup, supernatant; pel,  
479 pellet. A representative stain-free gel is shown. The fractions of ExoY that co-sedimented with  
480 F-actin were quantified by densitometry and plotted against Lifeact concentrations in **B**. **C:**  
481 Level of actin ADP-ribosylation by TccC3HVR in the presence of Lifeact was analyzed by  
482 Western blot using an ADP-ribose binding reagent. The equal loading of actin was additionally  
483 checked by imaging the same stain-free gel prior to blotting (lower image). The ADP-  
484 ribosylation level of actin was quantified by densitometry and plotted against Lifeact  
485 concentrations in **D**. Error bars at **B** and **D** correspond to standard deviations of three  
486 independent experiments. **E:** HEK 293T cells expressing mCherry fusions of actin or LifeAct  
487 variants were intoxicated with 300 pM of the *P. luminescens* toxin PTC3, which injects  
488 TccC3HVR into cells. The degree of cytoskeletal collapse and accompanying cell shrinkage  
489 was monitored for 5 h using live cell imaging, and is plotted in **F** based on three independent  
490 experiments for each condition. Scale bars, 20  $\mu$ m.

491



492 **Figure S1. Overview of the cryo-EM data.** **A, B:** Example micrograph (**A**) and its power  
493 spectrum (**B**) at  $\sim -1.5 \mu\text{m}$  defocus. Filaments selected automatically by crYOLO are  
494 highlighted as differently colored dots. Scale bar  $10 \mu\text{m}$ . **C:** Density map of the Lifeact-F-actin  
495 complex colored according to the local resolution. **D:** Orientation distribution of the particles  
496 used in the final refinement round. **E:** Fourier shell correlation (FSC) for the masked and un-  
497 masked final reconstructions. The FSC was calculated in the central  $120 \text{ \AA}$  area of the map.

498

499 **Figure S2. Fit quality of the atomic model of LifeAct.** **A:** Minimized energy of models of all  
500 possible registers of the LifeAct sequence into the density. Start1 and 2 correspond to the  
501 peptides starting at M1 or G2 with their N-termini pointing towards the pointed end of the  
502 filament. For Start1-rev and Start2-rev the N-termini points towards the barbed end. The  
503 Rosetta energy values show a clear preferred solution. **B:** Density fit of the final model  
504 corresponding to the energy minimum seen in (**A**).

505

506 **Figure S3. Comparison of D-loop conformations.** The density maps and corresponding  
507 atomic models of Lifeact-F-actin-ADP- $\text{P}_i$ -phalloidin in comparison to those of the open D-loop  
508 state in F-actin-ADP- $\text{P}_i$ -phalloidin (PDB 6T1Y, EMDB 10363) (Pospich et al., 2019) and  
509 closed D-loop state in F-actin-ADP-phalloidin (PDB 6T20, EMDB 10364) (Pospich et al.,  
510 2019).

511

512 **Movie S1. Stabilization of the D-loop in its closed state upon Lifeact binding.** **A:** The  
513 density map of F-actin-ADP- $\text{P}_i$ -phalloidin (EMDB 10363, gray) is superimposed with the  
514 corresponding atomic model (PDB 6T20) (Pospich et al., 2019). **B:** Close-up view of the D-  
515 loop and the C-terminal interface of F-actin-ADP- $\text{P}_i$ -phalloidin complex. Possible position of  
516 Lifeact on F-actin-ADP- $\text{P}_i$ -phalloidin shown in transparent green. Note that the D-loop is in its  
517 open state. **C:** Close-up view on the interface between Lifeact and F-actin-ADP- $\text{P}_i$ -phalloidin  
518 complex. I13 of Lifeact interacts with M47 of F-actin, stabilizing the closed D-loop  
519 conformation in F-actin. **D:** Overview of the complete Lifeact-F-actin-ADP- $\text{P}_i$ -phalloidin map  
520 and the corresponding atomic model.

521

522

523

524

525

526 **Table 1.**

527 Cryo-EM data collection, refinement and validation statistics

**Microscopy**

|                                                 |                          |
|-------------------------------------------------|--------------------------|
| Microscope                                      | Talos Arctica            |
| Voltage (kV)                                    | 200                      |
| Defocus range ( $\mu\text{m}$ )                 | -0.6 to -3.35            |
| Camera                                          | Falcon III (Linear mode) |
| Pixel size ( $\text{\AA}$ )                     | 1.21                     |
| Total electron dose ( $\text{e}/\text{\AA}^2$ ) | 60                       |
| Exposure time (s)                               | 3                        |
| Frames per movie                                | 40                       |
| Number of images                                | 915 (1,415)              |

**3D Refinement**

|                                   |                   |
|-----------------------------------|-------------------|
| Number of helical segments        | 223,480 (246,423) |
| Final resolution ( $\text{\AA}$ ) | 3.5               |
| Map sharpening ( $\text{\AA}^2$ ) | -50               |
| Helical rise ( $\text{\AA}$ )     | 27.3              |
| Helical twist ( $^\circ$ )        | -167.18           |

**Atomic model statistics**

|                            |        |
|----------------------------|--------|
| Non-hydrogen atoms         | 15575  |
| Molprobity score           | 0.78   |
| Clashscore                 | 0.91   |
| EMRinger score             | 3.1    |
| Bond RMSD ( $\text{\AA}$ ) | 0.0155 |
| Angle RMSD ( $^\circ$ )    | 1.49   |
| Poor rotamers (%)          | 0.31   |
| Favored rotamers (%)       | 99.69  |
| Ramachandran favored (%)   | 98.42  |
| Ramachandran allowed (%)   | 1.58   |
| Ramachandran outliers (%)  | 0      |

528

529

530 **Author contribution**

531 A.B. prepared cryo-EM specimens and collected data. F.M. processed cryo-EM data, built the  
532 atomic model and design. A.B. performed *in vitro* competition and activity assays, and *in vivo*  
533 experiments in yeast. O.S. performed and analyzed intoxication assays in mammalian cells.  
534 A.B, F.M. and O.S. prepared figures and video. A.B., F.M. and O.S. wrote the original draft of  
535 the manuscript. S.R. supervised the project, reviewed and edited the manuscript. All authors  
536 reviewed the results and commented on the manuscript.

537

538

## 539 Acknowledgements

540 We thank S. Shydlovskiy for assistance with data collection, O. Hofnagel and D. Prumbaum  
541 for maintaining the EM facility, S. Bergbrede and M. Hülseweh for the excellent technical  
542 assistance, W. Linke and A. Unger (Ruhr-Universität Bochum, Germany) for providing us with  
543 muscle acetone powder, S. Rospert (University of Freiburg, Germany) for providing us anti-  
544 RPS9 serum, and S. Pospich for fruitful discussions. This work has been funded by the Max  
545 Planck Society (S.R.). A.B. is a fellow of the Humboldt foundation.

## 546 Supplementary materials and methods

547 Table S1. List of primers, strains and plasmids used in this study.

| Bacterial and yeast strains                             | Description                                                                                                                                                                                                                                                               | Reference              |
|---------------------------------------------------------|---------------------------------------------------------------------------------------------------------------------------------------------------------------------------------------------------------------------------------------------------------------------------|------------------------|
| <i>E. coli</i> DH5 $\alpha$                             | F <sup>-</sup> $\Phi$ 80 <i>lacZ</i> $\Delta$ M15 $\Delta$ ( <i>lacZYA-argF</i> ) U169 <i>recA1 endA1 hsdR17</i> (r <sub>k</sub> <sup>-</sup> , m <sub>k</sub> <sup>+</sup> )<br><i>phoA supE44 thi-1 gyrA96 relA1</i> $\lambda$                                          | Invitrogen             |
| <i>E. coli</i> BL21 DE3                                 | F <sup>-</sup> <i>ompT hsdS<sub>B</sub></i> (r <sub>B</sub> <sup>-</sup> m <sub>B</sub> <sup>-</sup> ) <i>gal dcm</i> (DE3)                                                                                                                                               | Novagen                |
| <i>E. coli</i> BL21 DE3<br>CodonPlus RIPL               | F <sup>-</sup> <i>ompT hsdS</i> (r <sub>B</sub> <sup>-</sup> m <sub>B</sub> <sup>-</sup> ) <i>dcm</i> <sup>+</sup> Tet <sup>r</sup> <i>gal</i> $\lambda$ (DE3) <i>endA Hte</i> [ <i>argU proL Cam</i> <sup>r</sup> ]<br>[ <i>argU ileY leuW Strep/Spec</i> <sup>r</sup> ] | Agilent                |
| <i>S. cerevisiae</i> MH272-3fa                          | “Wild-type” strain, <i>ura3, leu2, his3, trp1, ade2</i>                                                                                                                                                                                                                   | (Peisker et al., 2008) |
| <i>S. cerevisiae</i> SC483                              | <i>S. cerevisiae</i> MH272-3fa <i>act1::LEU2 + ACT1</i> [Ura3]                                                                                                                                                                                                            | (Belyy et al., 2015)   |
| <i>S. cerevisiae</i> SC489                              | <i>S. cerevisiae</i> MH272-3fa <i>act1::LEU2 + ACT1</i> [His3]                                                                                                                                                                                                            | (Belyy et al., 2015)   |
| <i>S. cerevisiae</i> SC690                              | <i>S. cerevisiae</i> MH272-3fa <i>act1::LEU2 + ACT1</i> D25Y/D222G[His3]                                                                                                                                                                                                  | (Belyy et al., 2016)   |
| <i>S. cerevisiae</i> Y446                               | <i>S. cerevisiae</i> MH272-3fa + empty vector[Ura3] (pESC-Ura)                                                                                                                                                                                                            | This study             |
| <i>S. cerevisiae</i> Y453                               | <i>S. cerevisiae</i> MH272-3fa + Lifeact-mCherry[Ade] (2477)                                                                                                                                                                                                              | This study             |
| <i>S. cerevisiae</i> Y479                               | <i>S. cerevisiae</i> MH272-3fa <i>act1::LEU2 + ACT1</i> D25Y/D222G[His3] +<br>Lifeact-mCherry[Ade] (2477)                                                                                                                                                                 | This study             |
| <i>S. cerevisiae</i> Y484                               | <i>S. cerevisiae</i> MH272-3fa <i>act1::LEU2 + ACT1</i> L349M[His3] (2478)<br>Strain <i>S. cerevisiae</i> SC483 was transformed with plasmid 2478 and passed<br>over 5-FOA to remove WT actin plasmid with Ura3-marker (Belyy et al.,<br>2015)                            | This study             |
| <i>S. cerevisiae</i> Y497                               | <i>S. cerevisiae</i> MH272-3fa <i>act1::LEU2 + ACT1</i> L349M[His3] + Lifeact-<br>mCherry[Ade] (2477)                                                                                                                                                                     | This study             |
| <i>S. cerevisiae</i> Y510                               | <i>S. cerevisiae</i> MH272-3fa + Lifeact-MBP[Ura3] (2481)                                                                                                                                                                                                                 | This study             |
| <i>S. cerevisiae</i> Y512                               | <i>S. cerevisiae</i> MH272-3fa + Lifeact L6K-MBP[Ura3] (2482)                                                                                                                                                                                                             | This study             |
| <i>S. cerevisiae</i> Y513                               | <i>S. cerevisiae</i> MH272-3fa + Lifeact F10A-MBP[Ura3] (2483)                                                                                                                                                                                                            | This study             |
| <i>S. cerevisiae</i> Y514                               | <i>S. cerevisiae</i> MH272-3fa + Lifeact I13A-MBP[Ura3] (2484)                                                                                                                                                                                                            | This study             |
| <i>S. cerevisiae</i> Y529                               | <i>S. cerevisiae</i> MH272-3fa <i>act1::LEU2 + ACT1</i> [His3] + Lifeact-<br>mCherry[Ade] (2477)                                                                                                                                                                          | This study             |
| <i>S. cerevisiae</i> Y552                               | <i>S. cerevisiae</i> MH272-3fa + Lifeact L6K-mCherry[Ade] (2485)                                                                                                                                                                                                          | This study             |
| <i>S. cerevisiae</i> Y553                               | <i>S. cerevisiae</i> MH272-3fa + Lifeact F10A-mCherry[Ade] (2486)                                                                                                                                                                                                         | This study             |
| <i>S. cerevisiae</i> Y554                               | <i>S. cerevisiae</i> MH272-3fa + Lifeact I13A-mCherry[Ade] (2487)                                                                                                                                                                                                         | This study             |
| <b>Plasmids for experiments in <i>S. cerevisiae</i></b> |                                                                                                                                                                                                                                                                           |                        |

|                                         |                                                                                                                                                                                                                                                                                                                                                                                                                                                                                                                                                                                                                                                                                                                                                                                                                                                                     |                      |
|-----------------------------------------|---------------------------------------------------------------------------------------------------------------------------------------------------------------------------------------------------------------------------------------------------------------------------------------------------------------------------------------------------------------------------------------------------------------------------------------------------------------------------------------------------------------------------------------------------------------------------------------------------------------------------------------------------------------------------------------------------------------------------------------------------------------------------------------------------------------------------------------------------------------------|----------------------|
| 2473 YEpGal555                          | <i>E. coli/S. cerevisiae</i> shuttle vector [ADE2] with Gal1 promoter                                                                                                                                                                                                                                                                                                                                                                                                                                                                                                                                                                                                                                                                                                                                                                                               | (Belyy et al., 2015) |
| 2474 pESC-Ura                           | <i>E. coli/S. cerevisiae</i> shuttle vector [URA3, Amp <sup>r</sup> ] with Gal1 and Gal10 promoters                                                                                                                                                                                                                                                                                                                                                                                                                                                                                                                                                                                                                                                                                                                                                                 | Agilent              |
| 2475 p1387 pRS313 Actin                 | <i>E. coli/S. cerevisiae</i> shuttle vector [HIS3, Ap <sup>r</sup> ] based on pRS313 vector, containing Act1 gene with native promoter and terminator.                                                                                                                                                                                                                                                                                                                                                                                                                                                                                                                                                                                                                                                                                                              | (Belyy et al., 2018) |
| 2476 pB399 pESC-Ura<br>Lifeact-mCherry  | The mCherry gene was amplified from 693 using oligonucleotides tataagaattcatggtagcaagggcgaggag and tataatcgatgactgtacagctcgtccatgcc. The resulting PCR fragment was digested with EcoRI and ClaI and ligated into digested 2474 pESC-Ura vector.                                                                                                                                                                                                                                                                                                                                                                                                                                                                                                                                                                                                                    | This study           |
| 2477 pB430 YEpGal555<br>Lifeact-mCherry | DNA fragments containing 5'UTR and the Lifeact-encoding sequence of ABP140 were amplified from genomic DNA of <i>S. cerevisiae</i> MH272-3fa strain using oligonucleotides tatagcgccgcagaactgcaccgtacgctcaga and ctactggcgcgcttctctttgagatgctttcg.<br>The 3'UTR of ABP140 was amplified from genomic DNA of <i>S. cerevisiae</i> MH272-3fa strain using oligonucleotides gataagatctgaaataggaagtctgagacaagtacc and tatagagctcaaattttatatacacgaaggtg. mCherry was amplified from 2476 using oligonucleotides cttctatttcagatcttatcgtcgtcatcc and ggaagaaggcgcgccagtgagcaagggcgaggaggataac. Products of these three independent reactions were mixed and amplified with oligonucleotides tatagcgccgcagaactgcaccgtacgctcaga and tatagagctcaaattttatatacacgaaggtg. The final PCR product was digested with NotI and SacI and ligated into digested 2473 YEpGal555 vector. | This study           |
| 2478 pB449 pRS313 Actin<br>L349M        | The L349M mutation was generated by two-step overlap PCR using oligonucleotides tcttgcttctatgactaccttccaa, caggaaacagctatgacc, ttggaaggtagtcataagaaccaaga and ttcgtgataagtgatagtg. The PCR product was digested with ClaI and SalI and was used to exchange the WT ACT1 gene in 2475 p1387 pRS313 Actin.                                                                                                                                                                                                                                                                                                                                                                                                                                                                                                                                                            | This study           |
| 2481 pB464 pESC-Ura<br>Lifeact-MBP      | The plasmid was constructed in two steps. First, LifeAct-coding sequence was added to 2480 by inserting annealed oligonucleotides catgggtgtcgcagatttgatcaagaattcgaaagcatctcaaaggaagaagg and taccttctcctttgagatgctttcgaattcttgatcaaatctgcgacacc into NcoI/NdeI-digested 2480. Then, the resulting plasmid was used to amplify Lifeact-MBP fragment using oligonucleotides ctttaagaaggagagaattcatgggtgctc and tatacgccgggtgatgatgatgatgatgattgtg. The PCR product was digested with EcoRI and Eco52I, and ligated into digested 2474 pESC-Ura vector.                                                                                                                                                                                                                                                                                                                 | This study           |

|                                                      |                                                                                                                                                                                                                                                                                                                                                                                                                                                                                                                                        |                   |
|------------------------------------------------------|----------------------------------------------------------------------------------------------------------------------------------------------------------------------------------------------------------------------------------------------------------------------------------------------------------------------------------------------------------------------------------------------------------------------------------------------------------------------------------------------------------------------------------------|-------------------|
| <p>2482 pB481 pESC-Ura<br/>Lifeact L6K-MBP</p>       | <p>The plasmid was constructed in two steps. First, LifeAct-coding sequence was added to 2480 by inserting annealed oligonucleotides catgggtgctgcagataagatcaagaaattcgaaagcatctcaaaggaagaagg and taccttctcctttgagatgcttcgaattcttgatcttatctgcgacacc into NcoI/NdeI-digested 2480. Then, the resulting plasmid was used to amplify Lifeact-MBP fragment using oligonucleotides cttaagaaggagagaattcatgggtgctc and tatacggccggtgatgatgatgatgatgattgttg, digested with EcoRI and Eco52I, and ligated into digested 2474 pESC-Ura vector.</p> | <p>This study</p> |
| <p>2483 pB482 pESC-Ura<br/>Lifeact F10A-MBP</p>      | <p>The plasmid was constructed in two steps. First, LifeAct-coding sequence was added to 2480 by inserting annealed oligonucleotides catgggtgctgcagatttgatcaagaaagccgaagcatctcaaaggaagaagg and taccttctcctttgagatgcttcggttcttgatcaaatctgcgacacc into NcoI/NdeI-digested 2480. Then, the resulting plasmid was used to amplify Lifeact-MBP fragment using oligonucleotides cttaagaaggagagaattcatgggtgctc and tatacggccggtgatgatgatgatgatgattgttg, digested with EcoRI and Eco52I, and ligated into digested 2474 pESC-Ura vector.</p>   | <p>This study</p> |
| <p>2484 pB483 pESC-Ura<br/>Lifeact I13A-MBP</p>      | <p>The plasmid was constructed in two steps. First, LifeAct-coding sequence was added to 2480 by inserting annealed oligonucleotides catgggtgctgcagatttgatcaagaaattcgaaagcgcctcaaaggaagaagg and taccttctcctttgaggcgttcgaatttcttgatcaaatctgcgacacc into NcoI/NdeI-digested 2480. Then, the resulting plasmid was used to amplify Lifeact-MBP fragment using oligonucleotides cttaagaaggagagaattcatgggtgctc and tatacggccggtgatgatgatgatgatgattgttg, digested with EcoRI and Eco52I, and ligated into digested 2474 pESC-Ura vector.</p> | <p>This study</p> |
| <p>2485 pB516 YEpGal555<br/>Lifeact L6K-mCherry</p>  | <p>A DNA fragment encoding Lifeact with the mutation L6K was created from 2477 using oligonucleotides atatagcgccttctcctttgagatgcttcgaatttcttgatcttatctgcg and tatagcggccgcagaactgcaccgtacgctcaga. Then, the PteI and Eco52I-digested PCR-fragment was used to replace WT Lifeact sequence in 2477.</p>                                                                                                                                                                                                                                 | <p>This study</p> |
| <p>2486 pB517 YEpGal555<br/>Lifeact F10A-mCherry</p> | <p>A DNA fragment encoding Lifeact with the mutation F10A was created from 2477 using oligonucleotides atatagcgccttctcctttgagatgcttcggttcttg and tatagcggccgcagaactgcaccgtacgctcaga. Then, the PteI and Eco52I-digested PCR-fragment was used to replace WT Lifeact sequence in 2477.</p>                                                                                                                                                                                                                                              | <p>This study</p> |
| <p>2487 pB518 YEpGal555<br/>Lifeact I13A-mCherry</p> | <p>A DNA fragment encoding Lifeact with the mutation I13A was created from 2477 using oligonucleotides atatagcgccttctcctttgaggcgttcg and</p>                                                                                                                                                                                                                                                                                                                                                                                           | <p>This study</p> |

|                                                          |                                                                                                                                                                                                                                                                                                                                                                                                     |                      |
|----------------------------------------------------------|-----------------------------------------------------------------------------------------------------------------------------------------------------------------------------------------------------------------------------------------------------------------------------------------------------------------------------------------------------------------------------------------------------|----------------------|
|                                                          | tatagcggcgcagaaactgcaccgtacgctcaga. Then, the PteI and Eco52I-digested PCR-fragment was used to replace WT Lifeact sequence in 2477.                                                                                                                                                                                                                                                                |                      |
| <b>Plasmids for protein expression in <i>E. coli</i></b> |                                                                                                                                                                                                                                                                                                                                                                                                     |                      |
| 1315 pTriEx4_NMHC2C                                      | The motor domain of non-muscular myosin-2C (MYH14, isoform 2 from <i>H. sapiens</i> ) consisting of amino acids 1–799                                                                                                                                                                                                                                                                               | (Ecken et al., 2016) |
| 1609 pET19 tropomyosin                                   | The human tropomyosin alpha-1 gene was synthesized by General Biosystems and cloned into pET19 vector digested with NcoI/BamHI.                                                                                                                                                                                                                                                                     | This study           |
| 1855 cofilin                                             | Human cofilin-1                                                                                                                                                                                                                                                                                                                                                                                     | (Hsiao et al., 2015) |
| 2479 pB386 pET28a MBP-His-ExoY                           | The ExoY gene was amplified from pUM460 (Belyy et al., 2016) using oligonucleotides tatagagctctggctgatcgacggctcgcgca and tataaagctcagaccttacgttgaaaaagtc. The resulting PCR product was digested with SacI and HindIII and inserted into pB137 (Belyy et al., 2018) in frame with MBP tag.                                                                                                          | This study           |
| 2480 pB437 pET28a MBP-His                                | The MBP gene was amplified from pMAL-c5X (NEB) using oligonucleotides tatacatatgctgggctcgagcgggagctctgtaaaatcgagaaggtaaactggaatctgg and tatagatccttagtgatgatgatgatgattgtgtgtgttcgagctcgaattag. The resulting DNA fragment was digested with NdeI and BamHI and inserted into digested pET28a vector (Novagen).                                                                                      | This study           |
| 2488 pB500 pET28a MBP-His-Flag                           | To increase the size of the carrier protein, a 3x-Flag tag was added to 2480 using PCR and oligonucleotides tatacatatgctgggctcgagcgggagctctgtaaaatcgagaaggtaaactggaatctgg and tatagatccttattatcatcatcatctttataatcaaatcatgatctttataatcgccatcatgatctttataatcgaatgatggtgatgatgatgatgattgtgtgtgtg. The PCR fragment was digested with NdeI and BamHI and inserted into digested pET28a vector (Novagen) | This study           |
| 2489 pB502 pET28a Lifeact-MBP-His-Flag                   | The Lifeact-encoding sequence was generated by annealing oligonucleotides catgggtgctgcagattgatcaagaaattcgaagcatctcaaaggaagaagg and taccttctccttgagatgcttcgaattcttgatcaaatctgcgacacc, and inserting the resulting double-strand DNA into 2488 digested with NcoI and NdeI.                                                                                                                           | This study           |
| 2490 pB506 pET28a Lifeact E17K-MBP-His-Flag              | The Lifeact E17K-encoding sequence was generated by annealing oligonucleotides catgggtgctgcagattgatcaagaaattcgaagcatctcaaaggaagaagg and taccttttctccttgagatgcttcgaattcttgatcaaatctgcgacacc, and inserting the resulting double-strand DNA into 2488 digested with NcoI and NdeI.                                                                                                                    | This study           |

|                                                           |                                                                                                                                                                                                                                                                                                                                                                                                                                  |                             |
|-----------------------------------------------------------|----------------------------------------------------------------------------------------------------------------------------------------------------------------------------------------------------------------------------------------------------------------------------------------------------------------------------------------------------------------------------------------------------------------------------------|-----------------------------|
| 2491 pB524 pET28a<br>Lifect E16R-MBP-His-Flag             | The Lifect E16R-encoding sequence was generated by annealing oligonucleotides catgggtgctgcagattgatcaagaaattcgaagcatctcaaagcgtgaagg and taccttcacgctttgagatgctttgaattcttgatcaaatctgcgacacc, and inserting the resulting double-strand DNA into 2488 digested with NcoI and NdeI.                                                                                                                                                  | This study                  |
| 565 pET19b-TcdA1                                          | 6x His-tagged TcdA1 under control of a T7 promoter                                                                                                                                                                                                                                                                                                                                                                               | (Gatsogiannis et al., 2018) |
| 613 pET28a-TcdB2-TccC3                                    | 6x His-tagged TcdB2-TccC3 fusion under control of a T7 promoter                                                                                                                                                                                                                                                                                                                                                                  | (Gatsogiannis et al., 2016) |
| 579 pET19b-TccC3HVR                                       | 6x His-tagged TccC3(679–960) under control of a T7 promoter                                                                                                                                                                                                                                                                                                                                                                      | (Roderer et al., 2019)      |
| <b>Plasmids for protein expression in mammalian cells</b> |                                                                                                                                                                                                                                                                                                                                                                                                                                  |                             |
| 693 pDEST Lifect-mCherry                                  | WT Lifect-mCherry under a CMV promoter                                                                                                                                                                                                                                                                                                                                                                                           | (Smyth et al., 2012)        |
| 2492 pB514 pDEST Lifect F10A-mCherry                      | To obtain the F10A mutation in Lifect, the Sall/BamHI fragment of 693 containing WT Lifect was replaced by a double stranded DNA fragment that was generated by annealing oligonucleotides<br>tcgactggatcatggcgctggccgacctgatcaagaaggccgagagcatcagcaaggaggagtcgag<br>atatctagaccagctttctgtacaagtggttcgatgg and<br>gatcccatgaaccactttgtacaagaaagctgggtctagatatctcgactcctccttgctgatgctctcgcc<br>cttcttgatcaggtcggccagcccatgatccag. | This study                  |
| 2493 pB515 pDEST Lifect E17K-mCherry                      | To obtain the E17K mutation in Lifect, the Sall/BamHI fragment of 693 containing WT Lifect was replaced by a double stranded DNA fragment that was generated by annealing oligonucleotides<br>tcgactggatcatggcgctggccgacctgatcaagaagttcgagagcatcagcaaggagaaatcgagat<br>atctagaccagctttctgtacaagtggttcgatgg and<br>gatcccatgaaccactttgtacaagaaagctgggtctagatatctcgatttctccttgctgatgctctcgaa<br>cttcttgatcaggtcggccagcccatgatccag. | This study                  |
| mCherry-Actin-C-18                                        | mCherry-actin under a CMV promoter                                                                                                                                                                                                                                                                                                                                                                                               | (Rizzo et al., 2009)        |

548

549



## 550 References

- 551 Aizawa, H., Sameshima, M., Yahara, I., 1997. A green fluorescent protein-actin fusion  
552 protein dominantly inhibits cytokinesis, cell spreading, and locomotion in *Dictyostelium*.  
553 *Cell Struct Funct* 22, 335–345. doi:10.1247/csf.22.335
- 554 Ballestrem, C., Wehrle-Haller, B., Imhof, B.A., 1998. Actin dynamics in living mammalian  
555 cells. *J Cell Sci* 111 ( Pt 12), 1649–1658.
- 556 Belin, B.J., Goins, L.M., Mullins, R.D., 2014. Comparative analysis of tools for live cell  
557 imaging of actin network architecture. *Bioarchitecture* 4, 189–202.  
558 doi:10.1080/19490992.2014.1047714
- 559 Belyy, A., Raoux-Barbot, D., Saveanu, C., Namane, A., Ogryzko, V., Worpenberg, L., David,  
560 V., Henriot, V., Fellous, S., Merrifield, C., Assayag, E., Ladant, D., Renault, L., Mechold,  
561 U., 2016. Actin activates *Pseudomonas aeruginosa* ExoY nucleotidyl cyclase toxin and  
562 ExoY-like effector domains from MARTX toxins. *Nat Commun* 7, 13582.  
563 doi:10.1038/ncomms13582
- 564 Belyy, A., Santecchia, I., Renault, L., Bourigault, B., Ladant, D., Mechold, U., 2018. The  
565 extreme C terminus of the *Pseudomonas aeruginosa* effector ExoY is crucial for binding  
566 to its eukaryotic activator, F-actin. *J Biol Chem* 293, 19785–19796.  
567 doi:10.1074/jbc.RA118.003784
- 568 Belyy, A., Tabakova, I., Lang, A.E., Jank, T., Belyi, Y., Aktories, K., 2015. Roles of Asp179  
569 and Glu270 in ADP-Ribosylation of Actin by *Clostridium perfringens* Iota Toxin. *PLoS*  
570 *One* 10, e0145708.
- 571 Bubb, M.R., Spector, I., Beyer, B.B., Fosen, K.M., 2000. Effects of jasplakinolide on the  
572 kinetics of actin polymerization. An explanation for certain in vivo observations. *J Biol*  
573 *Chem* 275, 5163–5170. doi:10.1074/jbc.275.7.5163
- 574 Burkel, B.M., Dassow, von, G., Bement, W.M., 2007. Versatile fluorescent probes for actin  
575 filaments based on the actin-binding domain of utrophin. *Cell Motil Cytoskeleton* 64,  
576 822–832. doi:10.1002/cm.20226
- 577 Carlier, M.F., Laurent, V., Santolini, J., Melki, R., Didry, D., Xia, G.X., Hong, Y., Chua,  
578 N.H., Pantaloni, D., 1997. Actin depolymerizing factor (ADF/cofilin) enhances the rate of  
579 filament turnover: implication in actin-based motility. *J Cell Biol* 136, 1307–1322.  
580 doi:10.1083/jcb.136.6.1307
- 581 Coulton, A., Lehrer, S.S., Geeves, M.A., 2006. Functional homodimers and heterodimers of  
582 recombinant smooth muscle tropomyosin. *Biochemistry* 45, 12853–12858.  
583 doi:10.1021/bi0613224
- 584 Courtemanche, N., Pollard, T.D., Chen, Q., 2016. Avoiding artefacts when counting  
585 polymerized actin in live cells with LifeAct fused to fluorescent proteins. *Nat Cell Biol*  
586 18, 676–683. doi:10.1038/ncb3351
- 587 Crews, P., Manes, L.V., Boehler, M., 1986. Jasplakinolide, a cyclodepsipeptide from the  
588 marine sponge, Jaspis SP. *Tetrahedron Letters* 27, 2797–2800.  
589 doi:https://doi.org/10.1016/S0040-4039(00)84645-6
- 590 Croll, T.I., 2018. ISOLDE: a physically realistic environment for model building into low-  
591 resolution electron-density maps. *Acta Crystallogr D Struct Biol* 74, 519–530.  
592 doi:10.1107/S2059798318002425

- 593 Dancker, P., Low, I., Hasselbach, W., Wieland, T., 1975. Interaction of actin with phalloidin:  
594 polymerization and stabilization of F-actin. *Biochim Biophys Acta* 400, 407–414.  
595 doi:10.1016/0005-2795(75)90196-8
- 596 Daniel Gietz, R., Woods, R.A., 2002. Transformation of yeast by lithium acetate/single-  
597 stranded carrier DNA/polyethylene glycol method, in: Guthrie, C., Fink, G.R. (Eds.),  
598 Guide to Yeast Genetics and Molecular and Cell Biology - Part B, Methods in  
599 Enzymology. Academic Press, pp. 87–96.
- 600 DiMaio, F., Song, Y., Li, X., Brunner, M.J., Xu, C., Conticello, V., Egelman, E., Marlovits,  
601 T.C., Cheng, Y., Baker, D., 2015. Atomic-accuracy models from 4.5-Å cryo-electron  
602 microscopy data with density-guided iterative local refinement. *Nat Methods* 12, 361–  
603 365.
- 604 Ecken, von der, J., Heissler, S.M., Pathan-Chhatbar, S., Manstein, D.J., Raunser, S., 2016.  
605 Cryo-EM structure of a human cytoplasmic actomyosin complex at near-atomic  
606 resolution. *Nature* 534, 724–728. doi:10.1038/nature18295
- 607 Ecken, von der, J., Muller, M., Lehman, W., Manstein, D.J., Penczek, P.A., Raunser, S., 2015.  
608 Structure of the F-actin-tropomyosin complex. *Nature* 519, 114–117.  
609 doi:10.1038/nature14033
- 610 Emsley, P., Lohkamp, B., Scott, W.G., Cowtan, K., 2010. Features and development of Coot.  
611 *Acta Crystallogr D Biol Crystallogr* 66, 486–501. doi:10.1107/S0907444910007493
- 612 Fleishman, S.J., Leaver-Fay, A., Corn, J.E., Strauch, E.-M., Khare, S.D., Koga, N., Ashworth,  
613 J., Murphy, P., Richter, F., Lemmon, G., Meiler, J., Baker, D., 2011. RosettaScripts: a  
614 scripting language interface to the Rosetta macromolecular modeling suite. *PLoS One* 6,  
615 e20161.
- 616 Flores, L.R., Keeling, M.C., Zhang, X., Sliogeryte, K., Gavara, N., 2019. Lifeact-GFP alters  
617 F-actin organization, cellular morphology and biophysical behaviour. *Sci Rep* 9, 3241.  
618 doi:10.1038/s41598-019-40092-w
- 619 Gatsogiannis, C., Merino, F., Prumbaum, D., Roderer, D., Leidreiter, F., Meusch, D.,  
620 Raunser, S., 2016. Membrane insertion of a Tc toxin in near-atomic detail. *Nat Struct Mol*  
621 *Biol* 23, 884–890. doi:10.1038/nsmb.3281
- 622 Gatsogiannis, C., Merino, F., Roderer, D., Balchin, D., Schubert, E., Kuhlee, A., Hayer-Hartl,  
623 M., Raunser, S., 2018. Tc toxin activation requires unfolding and refolding of a  $\beta$ -  
624 propeller. *Nature* 563, 209–213. doi:10.1038/s41586-018-0556-6
- 625 Hsiao, J.Y., Goins, L.M., Petek, N.A., Mullins, R.D., 2015. Arp2/3 complex and cofilin  
626 modulate binding of tropomyosin to branched actin networks. *Curr Biol* 25, 1573–1582.  
627 doi:10.1016/j.cub.2015.04.038
- 628 Kost, B., Spielhofer, P., Chua, N.H., 1998. A GFP-mouse talin fusion protein labels plant  
629 actin filaments in vivo and visualizes the actin cytoskeleton in growing pollen tubes. *Plant*  
630 *J* 16, 393–401. doi:10.1046/j.1365-313x.1998.00304.x
- 631 Kumari, A., Kesarwani, S., Javoor, M.G., Vinothkumar, K.R., Sirajuddin, M., 2019.  
632 Structural insights into filament recognition by cellular actin markers. *bioRxiv*.  
633 doi:10.1101/846337
- 634 Kushnirov, V.V., 2000. Rapid and reliable protein extraction from yeast. *Yeast* 16, 857–860.  
635 doi:10.1002/1097-0061(20000630)16:9<857::AID-YEA561>3.0.CO;2-B

- 636 Lang, A.E., Schmidt, G., Schlosser, A., Hey, T.D., Larrinua, I.M., Sheets, J.J., Mannherz,  
637 H.G., Aktories, K., 2010. Photorhabdus luminescens toxins ADP-ribosylate actin and  
638 RhoA to force actin clustering. *Science* 327, 1139–1142. doi:10.1126/science.1184557
- 639 Liebschner, D., Afonine, P.V., Baker, M.L., Bunkoczi, G., Chen, V.B., Croll, T.I., Hintze, B.,  
640 Hung, L.W., Jain, S., McCoy, A.J., Moriarty, N.W., Oeffner, R.D., Poon, B.K., Prisant,  
641 M.G., Read, R.J., Richardson, J.S., Richardson, D.C., Sammito, M.D., Sobolev, O.V.,  
642 Stockwell, D.H., Terwilliger, T.C., Urzhumtsev, A.G., Videau, L.L., Williams, C.J.,  
643 Adams, P.D., 2019. Macromolecular structure determination using X-rays, neutrons and  
644 electrons: recent developments in Phenix. *Acta Crystallogr D Struct Biol* 75, 861–877.  
645 doi:10.1107/S2059798319011471
- 646 Lin, A.Y., Prochniewicz, E., James, Z.M., Svensson, B., Thomas, D.D., 2011. Large-scale  
647 opening of utrophin's tandem calponin homology (CH) domains upon actin binding by an  
648 induced-fit mechanism. *Proc Natl Acad Sci U S A* 108, 12729–12733.  
649 doi:10.1073/pnas.1106453108
- 650 Lopata, A., Hughes, R., Tiede, C., Heissler, S.M., Sellers, J.R., Knight, P.J., Tomlinson, D.,  
651 Peckham, M., 2018. Affimer proteins for F-actin: novel affinity reagents that label F-actin  
652 in live and fixed cells. *Sci Rep* 8, 6572. doi:10.1038/s41598-018-24953-4
- 653 Lynen, F., Wieland, U., 1938. Über die Giftstoffe des Knollenblätterpilzes. IV. Justus Liebigs  
654 *Annalen der Chemie* 533, 93–117. doi:10.1002/jlac.19385330105
- 655 Melak, M., Plessner, M., Grosse, R., 2017. Actin visualization at a glance. *J Cell Sci* 130,  
656 525–530. doi:10.1242/jcs.189068
- 657 Menten, A., Huehn, A., Liu, X., Zwolak, A., Dominguez, R., Shuman, H., Ostap, E.M.,  
658 Sindelar, C.V., 2018. High-resolution cryo-EM structures of actin-bound myosin states  
659 reveal the mechanism of myosin force sensing. *Proc Natl Acad Sci U S A* 115, 1292–  
660 1297. doi:10.1073/pnas.1718316115
- 661 Merino, F., Pospich, S., Funk, J., Wagner, T., Kullmer, F., Arndt, H.-D., Bieling, P., Raunser,  
662 S., 2018a. Structural transitions of F-actin upon ATP hydrolysis at near-atomic resolution  
663 revealed by cryo-EM. *Nat Struct Mol Biol* 25, 528–537. doi:10.1038/s41594-018-0074-0
- 664 Merino, F., Pospich, S., Funk, J., Wagner, T., Kullmer, F., Arndt, H.-D., Bieling, P., Raunser,  
665 S., 2018b. Structural transitions of F-actin upon ATP hydrolysis at near-atomic resolution  
666 revealed by cryo-EM. *Nat Struct Mol Biol* 25, 528–537. doi:10.1038/s41594-018-0074-0
- 667 Montes-Rodriguez, A., Kost, B., 2017. Direct Comparison of the Performance of Commonly  
668 Employed In Vivo F-actin Markers (Lifeact-YFP, YFP-mTn and YFP-FABD2) in  
669 Tobacco Pollen Tubes. *Front Plant Sci* 8, 1349. doi:10.3389/fpls.2017.01349
- 670 Moriarty, N.W., Grosse-Kunstleve, R.W., Adams, P.D., 2009. electronic Ligand Builder and  
671 Optimization Workbench (eLBOW): a tool for ligand coordinate and restraint generation.  
672 *Acta Crystallogr D Biol Crystallogr* 65, 1074–1080. doi:10.1107/S0907444909029436
- 673 Moriya, T., Saur, M., Stabrin, M., Merino, F., Voicu, H., Huang, Z., Penczek, P.A., Raunser,  
674 S., Gatsogiannis, C., 2017. High-resolution Single Particle Analysis from Electron Cryo-  
675 microscopy Images Using SPHIRE. *J Vis Exp*. doi:10.3791/55448
- 676 Munsie, L.N., Caron, N., Desmond, C.R., Truant, R., 2009. Lifeact cannot visualize some  
677 forms of stress-induced twisted F-actin. *Nat Methods* 6, 317. doi:10.1038/nmeth0509-317
- 678 Nagasaki, A., T Kijima, S., Yumoto, T., Imaizumi, M., Yamagishi, A., Kim, H., Nakamura,  
679 C., Q P Uyeda, T., 2017. The Position of the GFP Tag on Actin Affects the Filament  
680 Formation in Mammalian Cells. *Cell Struct Funct* 42, 131–140. doi:10.1247/csf.17016

- 681 Peisker, K., Braun, D., Wolfle, T., Hentschel, J., Funfschilling, U., Fischer, G., Sickmann, A.,  
682 Rospert, S., 2008. Ribosome-associated complex binds to ribosomes in close proximity of  
683 Rpl31 at the exit of the polypeptide tunnel in yeast. *Mol Biol Cell* 19, 5279–5288.  
684 doi:10.1091/mbc.e08-06-0661
- 685 Pettersen, E.F., Goddard, T.D., Huang, C.C., Couch, G.S., Greenblatt, D.M., Meng, E.C.,  
686 Ferrin, T.E., 2004. UCSF Chimera--a visualization system for exploratory research and  
687 analysis. *J Comput Chem* 25, 1605–1612. doi:10.1002/jcc.20084
- 688 Pollard, T.D., Cooper, J.A., 2009. Actin, a central player in cell shape and movement. *Science*  
689 326, 1208–1212. doi:10.1126/science.1175862
- 690 Pospich, S., Merino, F., Raunser, S., 2019. Structural effects and functional implications of  
691 phalloidin and jasplakinolide binding to actin filaments. *bioRxiv*. doi:10.1101/794495
- 692 Riedl, J., Crevenna, A.H., Kessenbrock, K., Yu, J.H., Neukirchen, D., Bista, M., Bradke, F.,  
693 Jenne, D., Holak, T.A., Werb, Z., Sixt, M., Wedlich-Soldner, R., 2008. Lifeact: a versatile  
694 marker to visualize F-actin. *Nat Methods* 5, 605–607. doi:10.1038/nmeth.1220
- 695 Riedl, J., Flynn, K.C., Raducanu, A., Gartner, F., Beck, G., Bosl, M., Bradke, F., Massberg,  
696 S., Aszodi, A., Sixt, M., Wedlich-Soldner, R., 2010. Lifeact mice for studying F-actin  
697 dynamics. *Nat Methods* 7, 168–169. doi:10.1038/nmeth0310-168
- 698 Rizzo, M.A., Rizzo, M.A., Davidson, M.W., Davidson, M.W., Piston, D.W., Piston, D.W.,  
699 2009. Fluorescent Protein Tracking and Detection: Fluorescent Protein Structure and  
700 Color Variants. *Cold Spring Harbor Protocols* 2009, pdb.top63–pdb.top63.  
701 doi:10.1101/pdb.top63
- 702 Roderer, D., Schubert, E., Sitsel, O., Raunser, S., 2019. Towards the application of Tc toxins  
703 as a universal protein translocation system. *Nat Commun* 10, 5263. doi:10.1038/s41467-  
704 019-13253-8
- 705 Sanders, T.A., Llagostera, E., Barna, M., 2013. Specialized filopodia direct long-range  
706 transport of SHH during vertebrate tissue patterning. *Nature* 497, 628–632.  
707 doi:10.1038/nature12157
- 708 Schiavon, C., Zhang, T., Zhao, B., Andrade, L., Wu, M., Sung, T.-C., Dayn, Y., Feng, J.W.,  
709 Quintero, O.A., Grosse, R., Manor, U., 2019. Actin chromobody imaging reveals sub-  
710 organellar actin dynamics. *bioRxiv*. doi:10.1101/639278
- 711 Schindelin, J., Arganda-Carreras, I., Frise, E., Kaynig, V., Longair, M., Pietzsch, T.,  
712 Preibisch, S., Rueden, C., Saalfeld, S., Schmid, B., Tinevez, J.-Y., White, D.J.,  
713 Hartenstein, V., Eliceiri, K., Tomancak, P., Cardona, A., 2012. Fiji: an open-source  
714 platform for biological-image analysis. *Nat Methods* 9, 676–682.  
715 doi:10.1038/nmeth.2019
- 716 Sheahan, M.B., Staiger, C.J., Rose, R.J., McCurdy, D.W., 2004. A green fluorescent protein  
717 fusion to actin-binding domain 2 of Arabidopsis fimbrin highlights new features of a  
718 dynamic actin cytoskeleton in live plant cells. *Plant Physiol* 136, 3968–3978.  
719 doi:10.1104/pp.104.049411
- 720 Sliogeryte, K., Thorpe, S.D., Wang, Z., Thompson, C.L., Gavara, N., Knight, M.M., 2016.  
721 Differential effects of LifeAct-GFP and actin-GFP on cell mechanics assessed using  
722 micropipette aspiration. *J Biomech* 49, 310–317. doi:10.1016/j.jbiomech.2015.12.034
- 723 Smyth, J.W., Vogan, J.M., Buch, P.J., Zhang, S.-S., Fong, T.S., Hong, T.-T., Shaw, R.M.,  
724 2012. Actin cytoskeleton rest stops regulate anterograde traffic of connexin 43 vesicles to  
725 the plasma membrane. *Circ Res* 110, 978–989. doi:10.1161/CIRCRESAHA.111.257964

- 726 Spracklen, A.J., Fagan, T.N., Lovander, K.E., Tootle, T.L., 2014. The pros and cons of  
727 common actin labeling tools for visualizing actin dynamics during *Drosophila* oogenesis.  
728 *Dev Biol* 393, 209–226. doi:10.1016/j.ydbio.2014.06.022
- 729 Tanaka, K., Takeda, S., Mitsuoka, K., Oda, T., Kimura-Sakiyama, C., Maéda, Y., Narita, A.,  
730 2018. Structural basis for cofilin binding and actin filament disassembly. *Nat Commun* 9,  
731 1860.
- 732 Wagner, T., Merino, F., Stabrin, M., Moriya, T., Antoni, C., Apelbaum, A., Hagel, P., Sitsel,  
733 O., Raisch, T., Prumbaum, D., Quentin, D., Roderer, D., Tacke, S., Siebolds, B.,  
734 Schubert, E., Shaikh, T.R., Lill, P., Gatsogiannis, C., Raunser, S., 2019. SPHIRE-  
735 crYOLO is a fast and accurate fully automated particle picker for cryo-EM. *Commun*  
736 *Biol* 2, 218. doi:10.1038/s42003-019-0437-z
- 737 Wang, R.Y.-R., Kudryashev, M., Li, X., Egelman, E.H., Basler, M., Cheng, Y., Baker, D.,  
738 DiMaio, F., 2015. De novo protein structure determination from near-atomic-resolution  
739 cryo-EM maps. *Nat Methods* 12, 335–338.
- 740 Zivanov, J., Nakane, T., Forsberg, B.O., Kimanius, D., Hagen, W.J., Lindahl, E., Scheres,  
741 S.H., 2018. New tools for automated high-resolution cryo-EM structure determination in  
742 RELION-3. *Elife* 7.
- 743

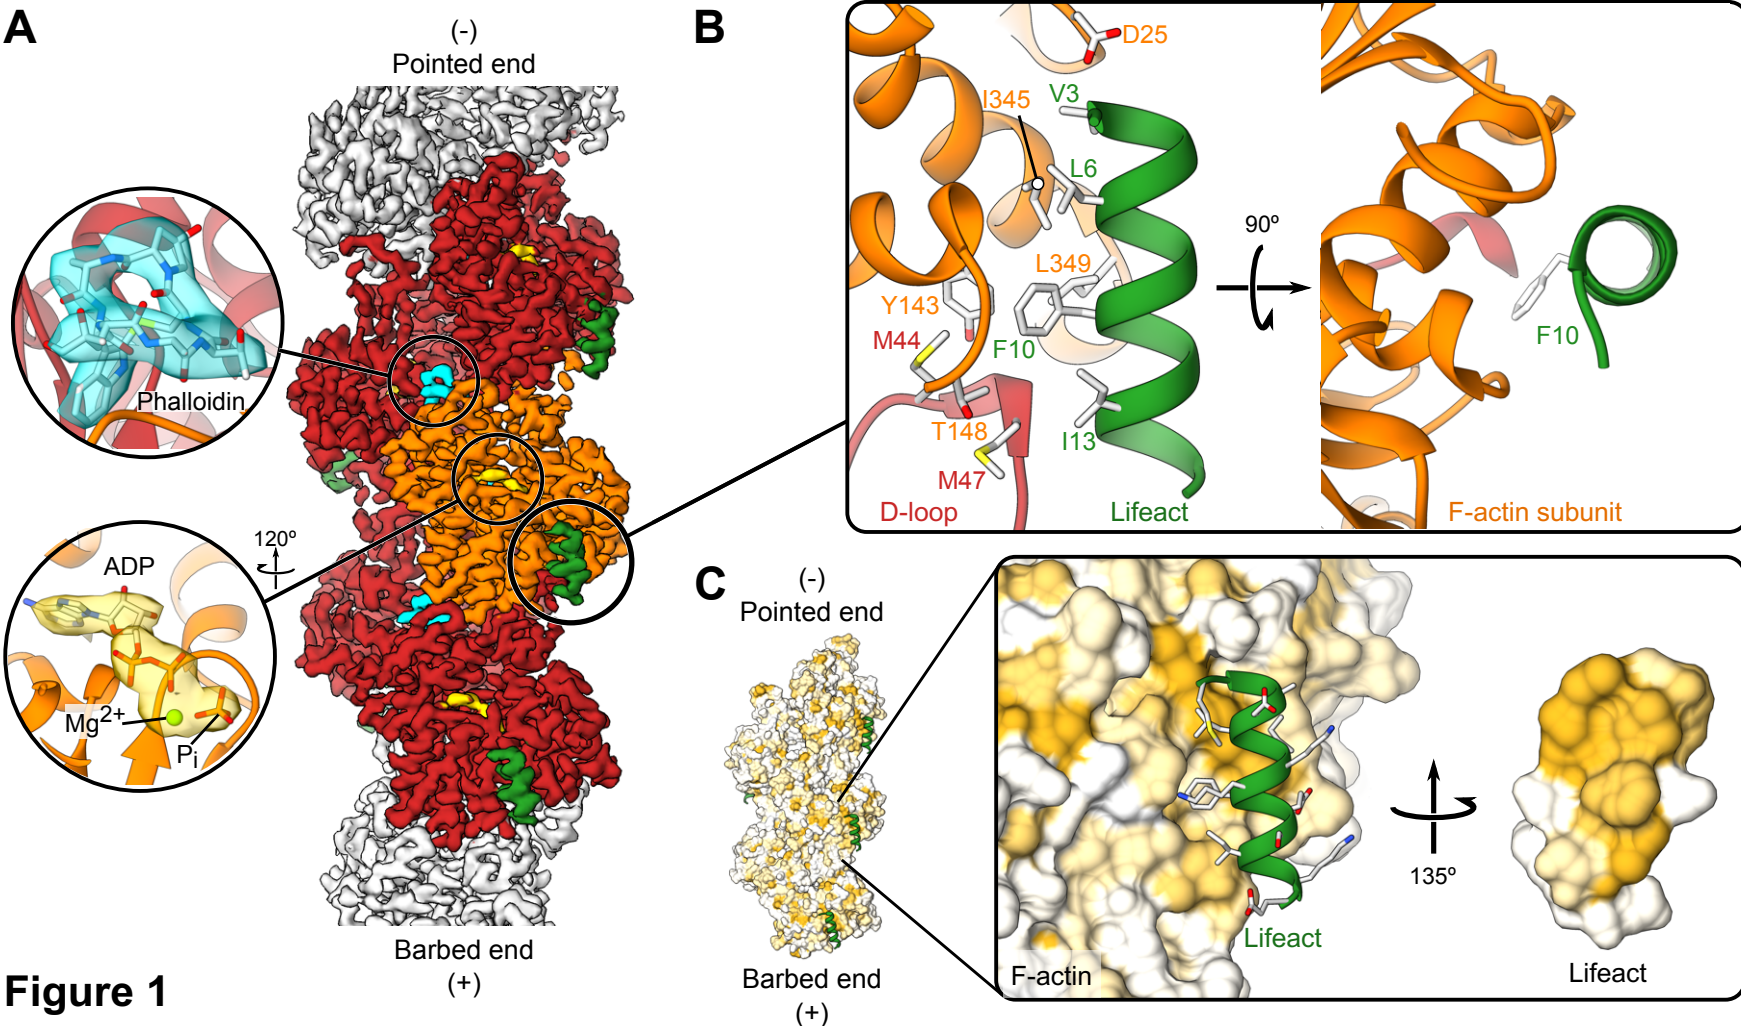

**Figure 1**

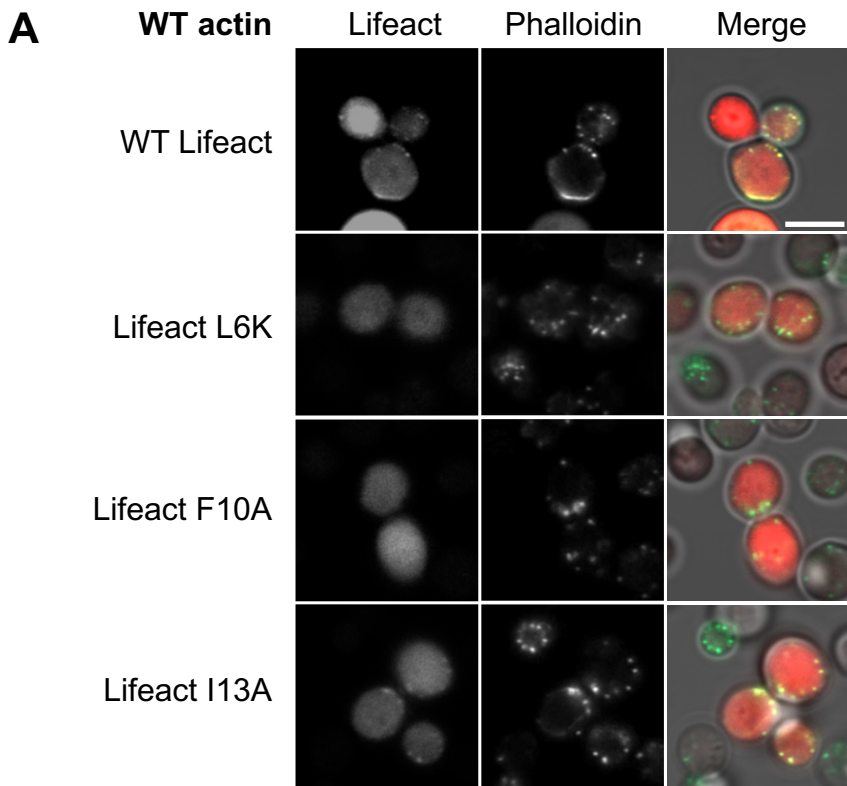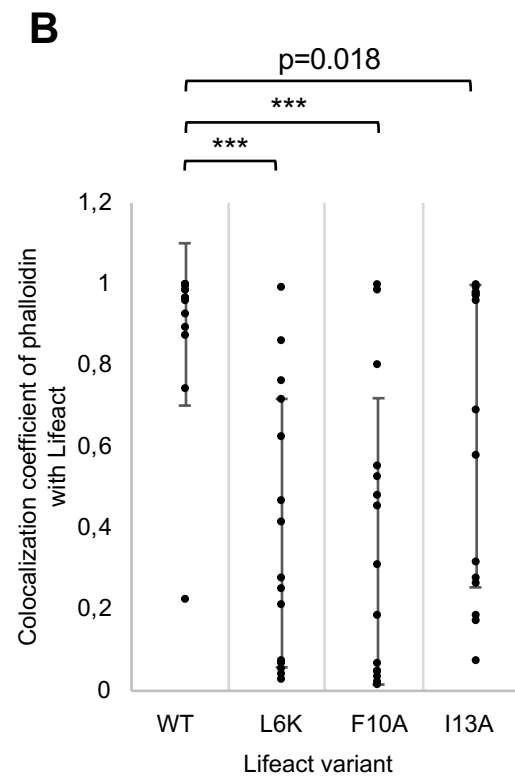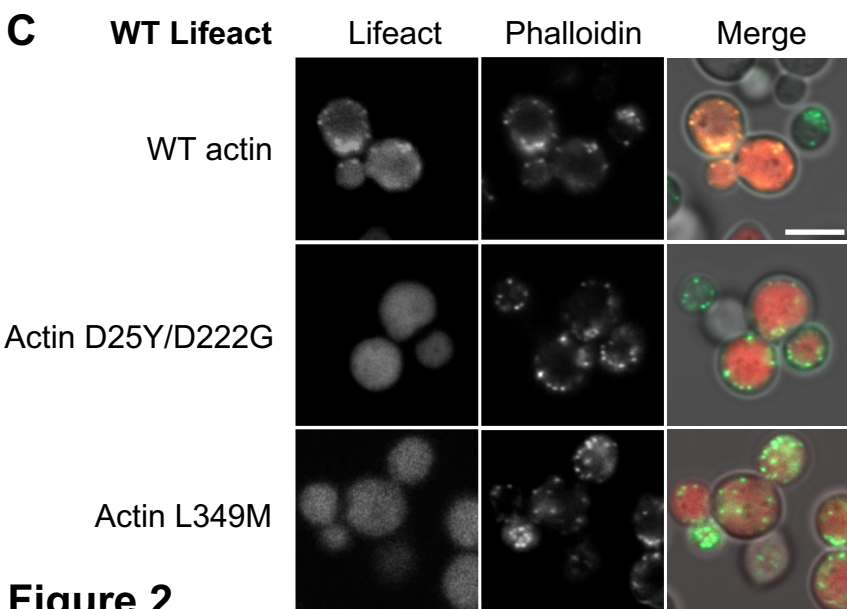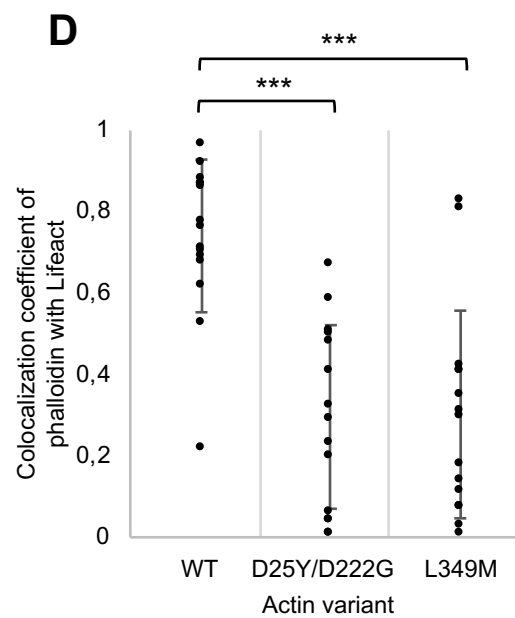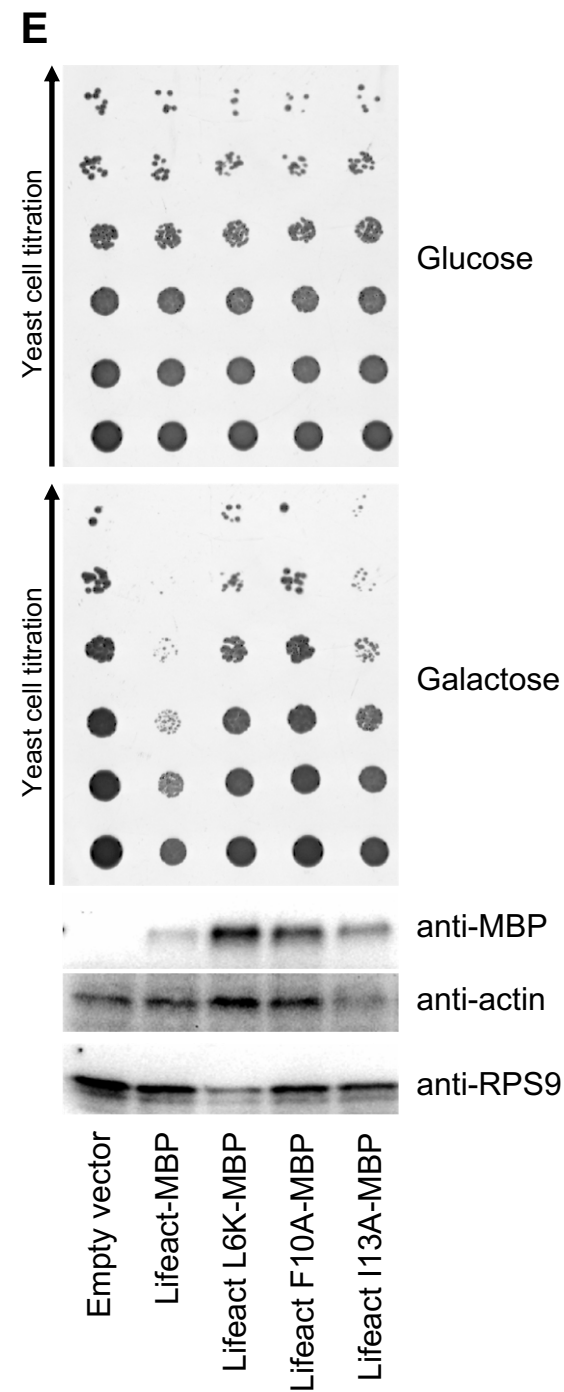

**Figure 2**

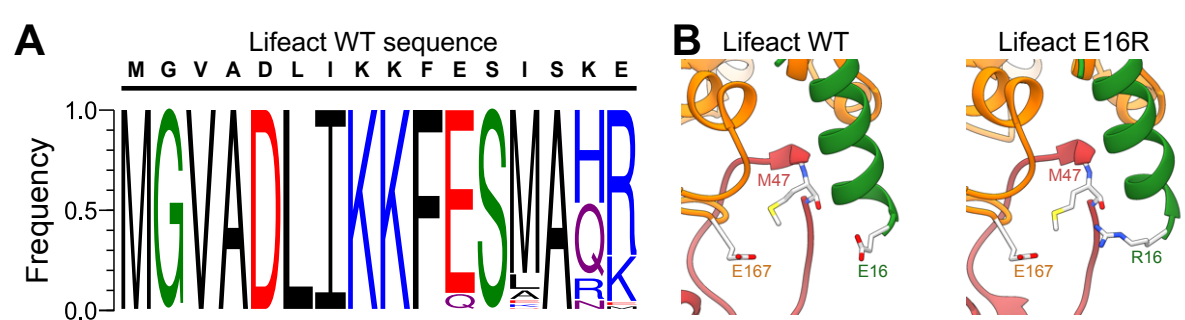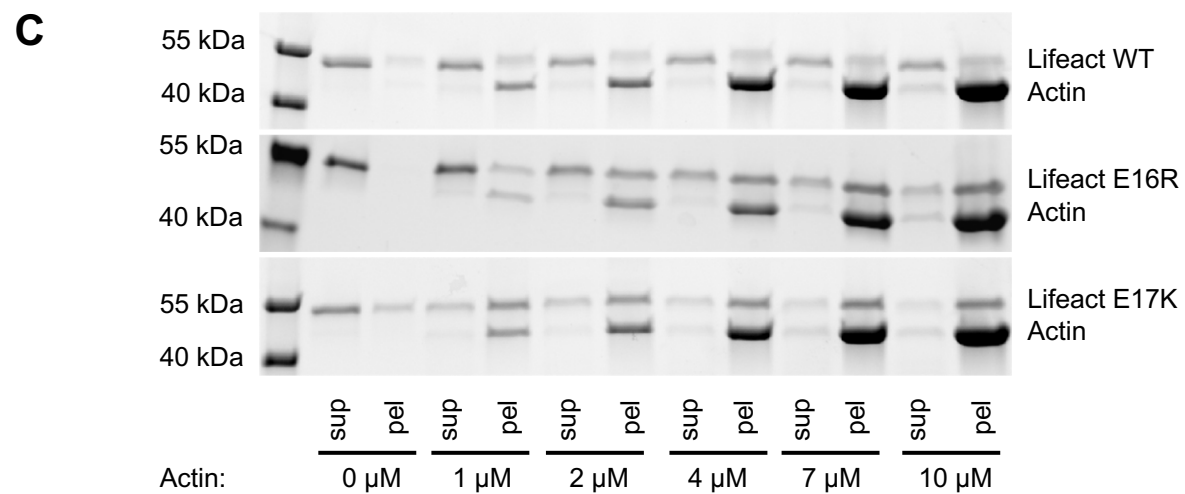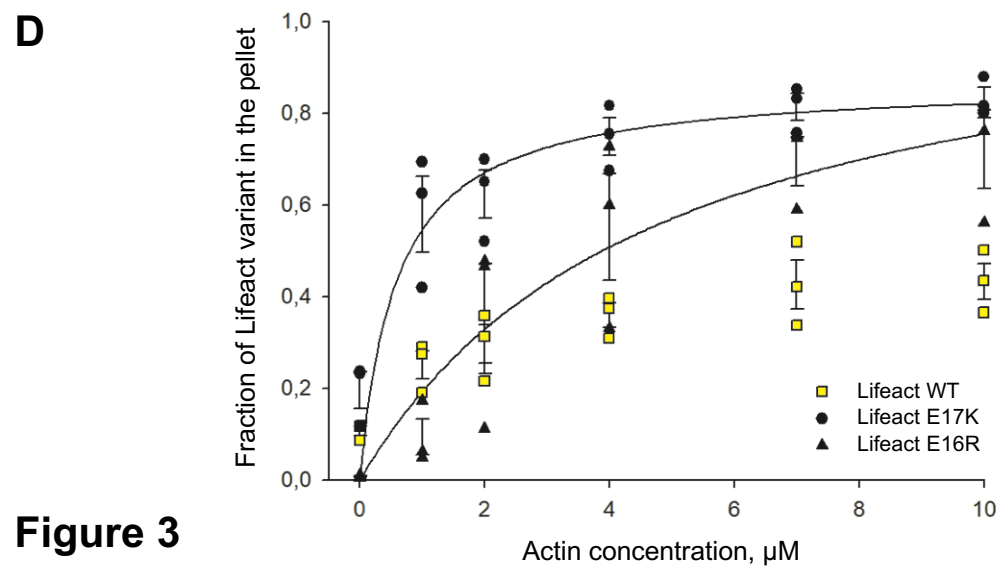

**Figure 3**



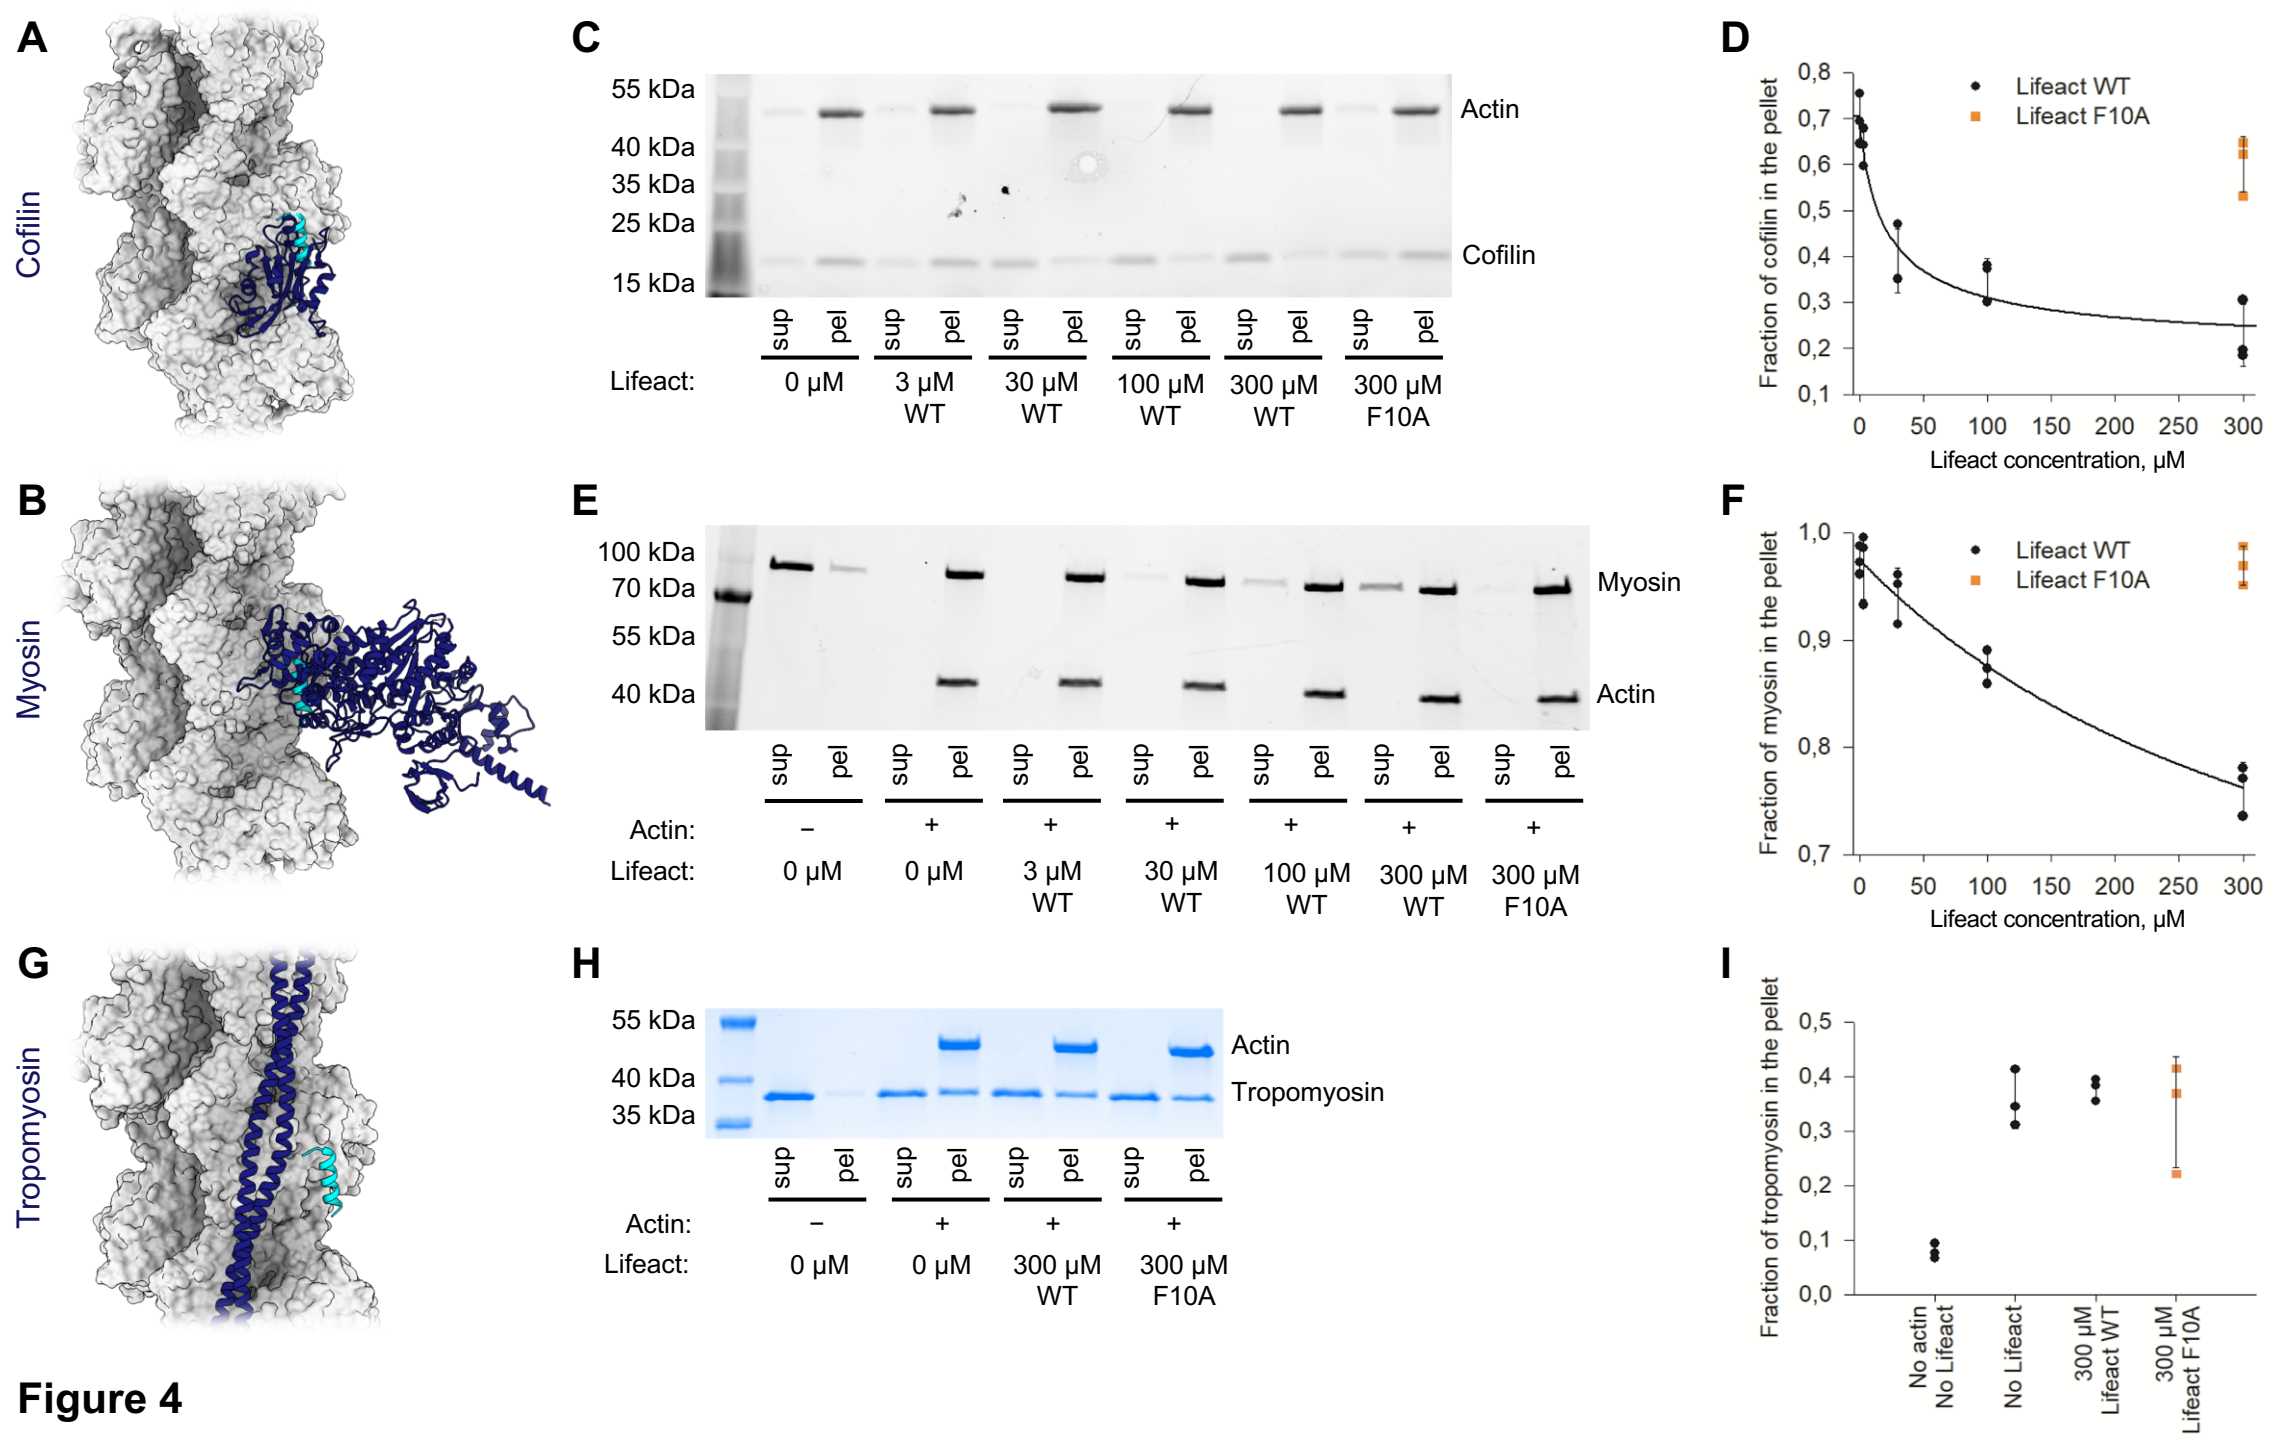

**Figure 4**

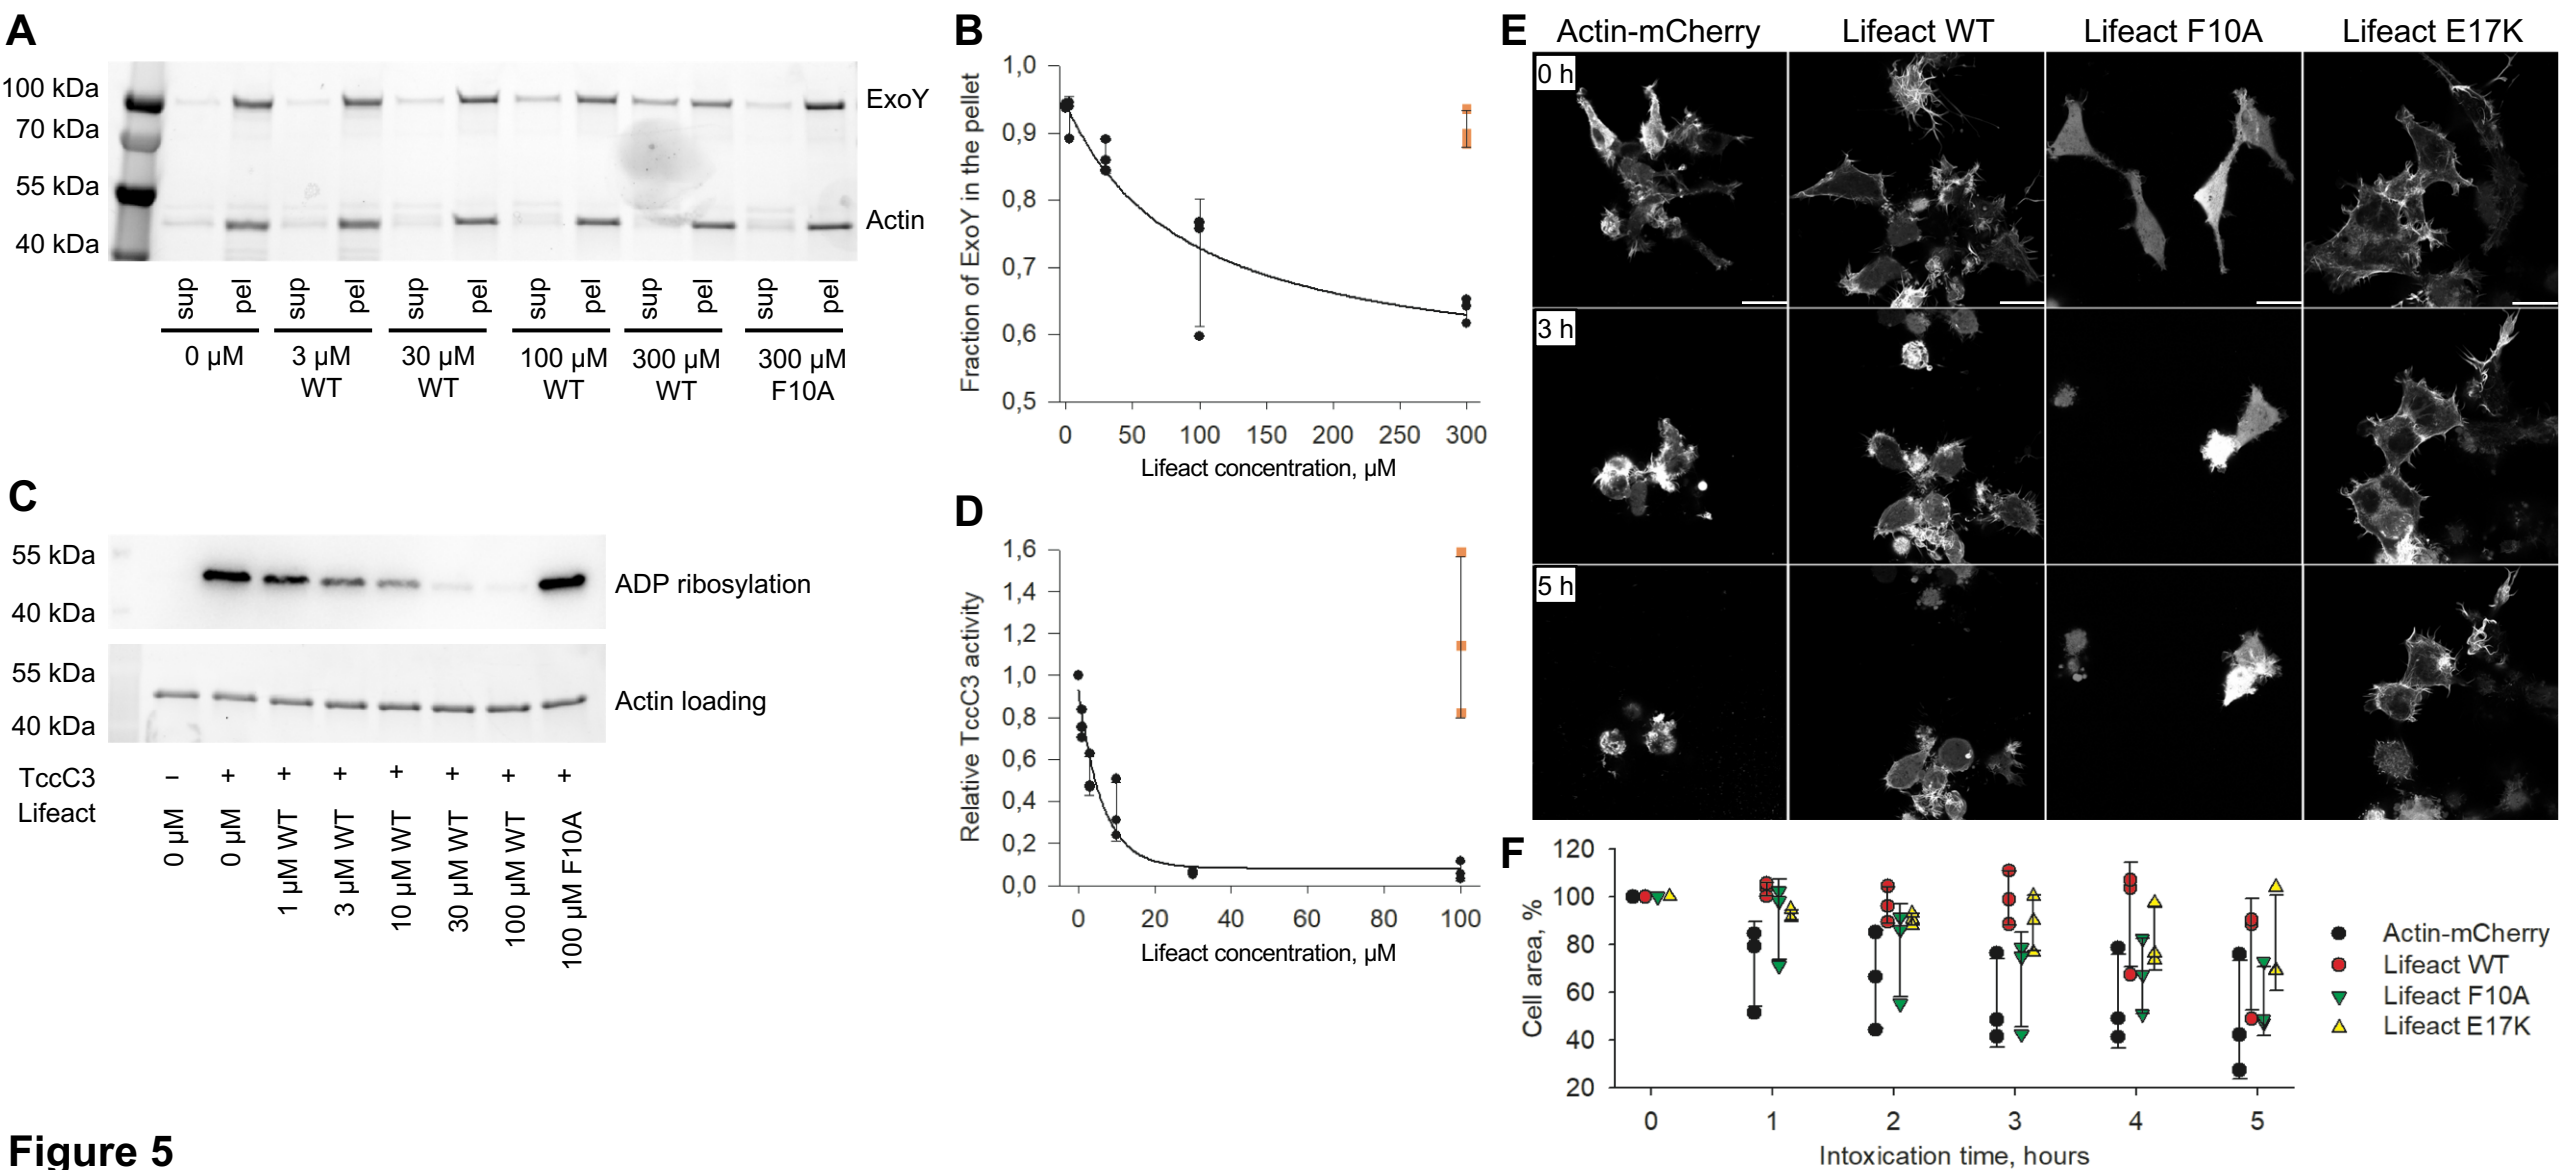

**Figure 5**

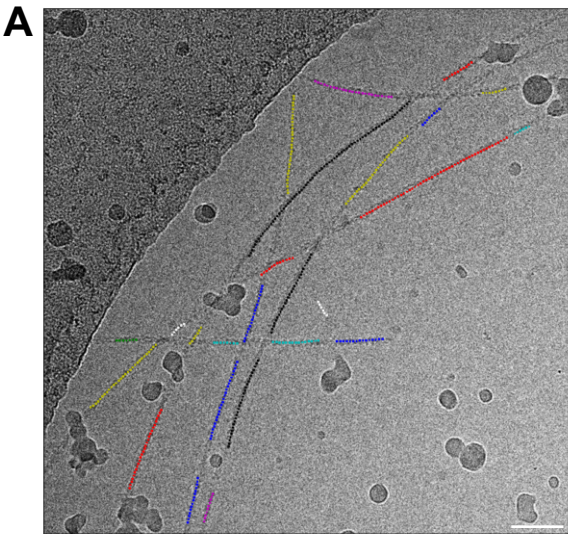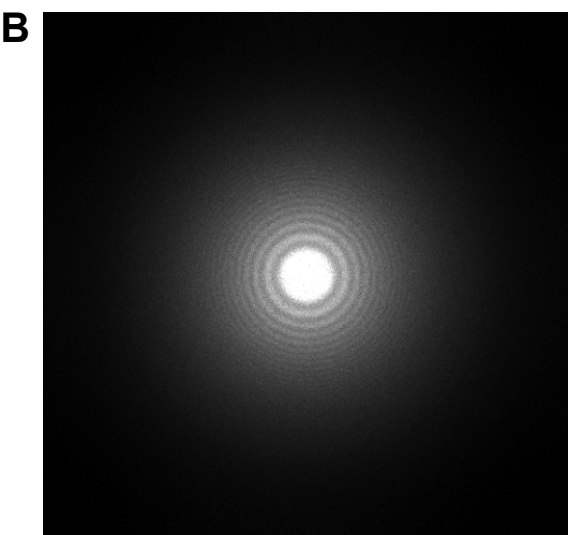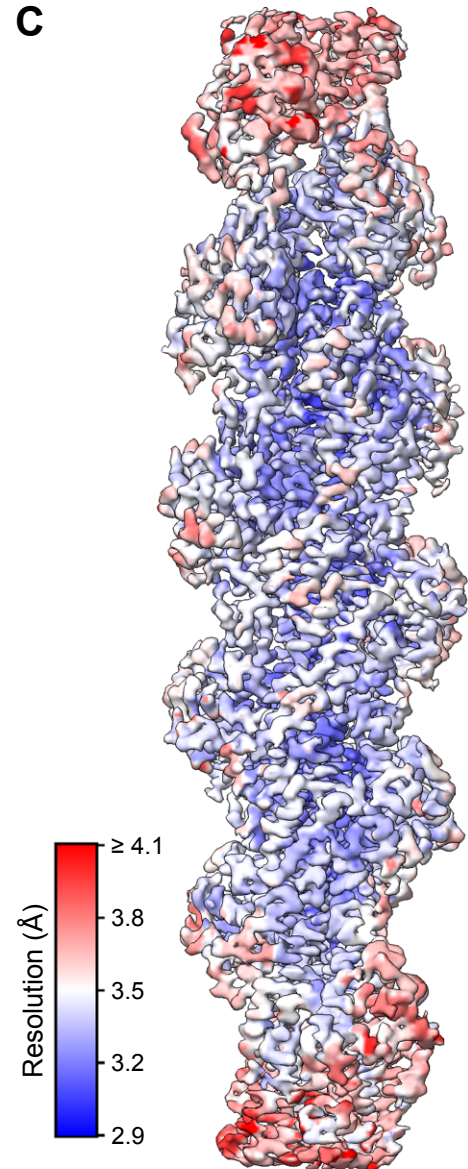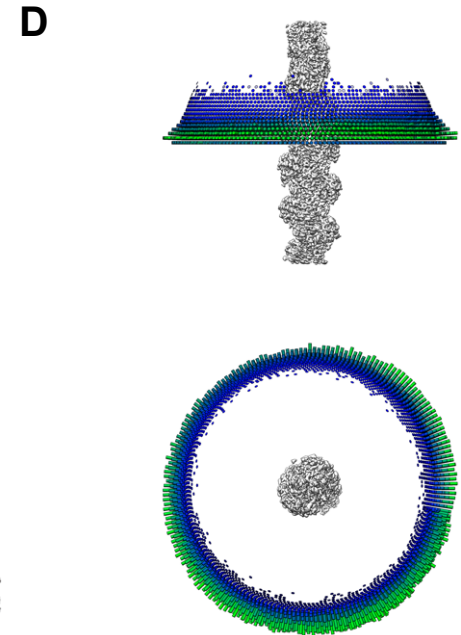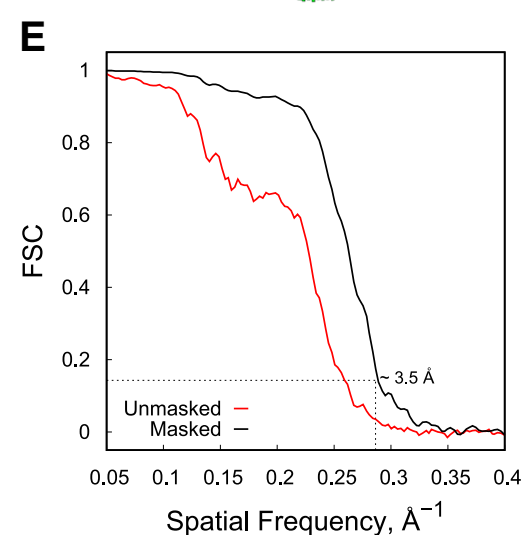

Figure S1

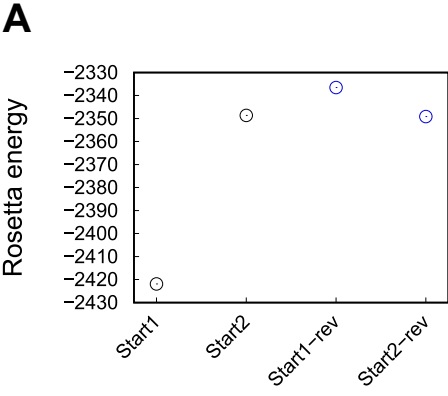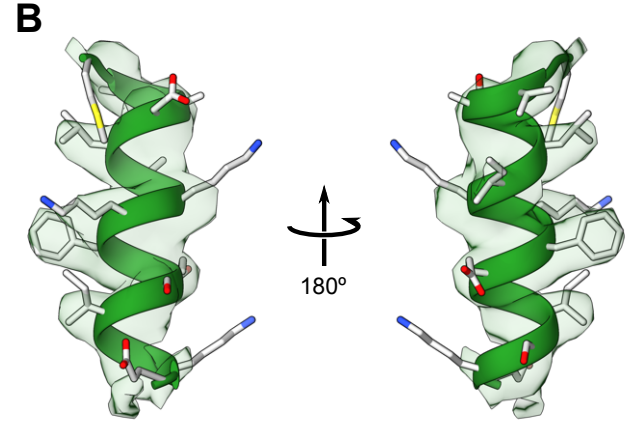

**Figure S2**

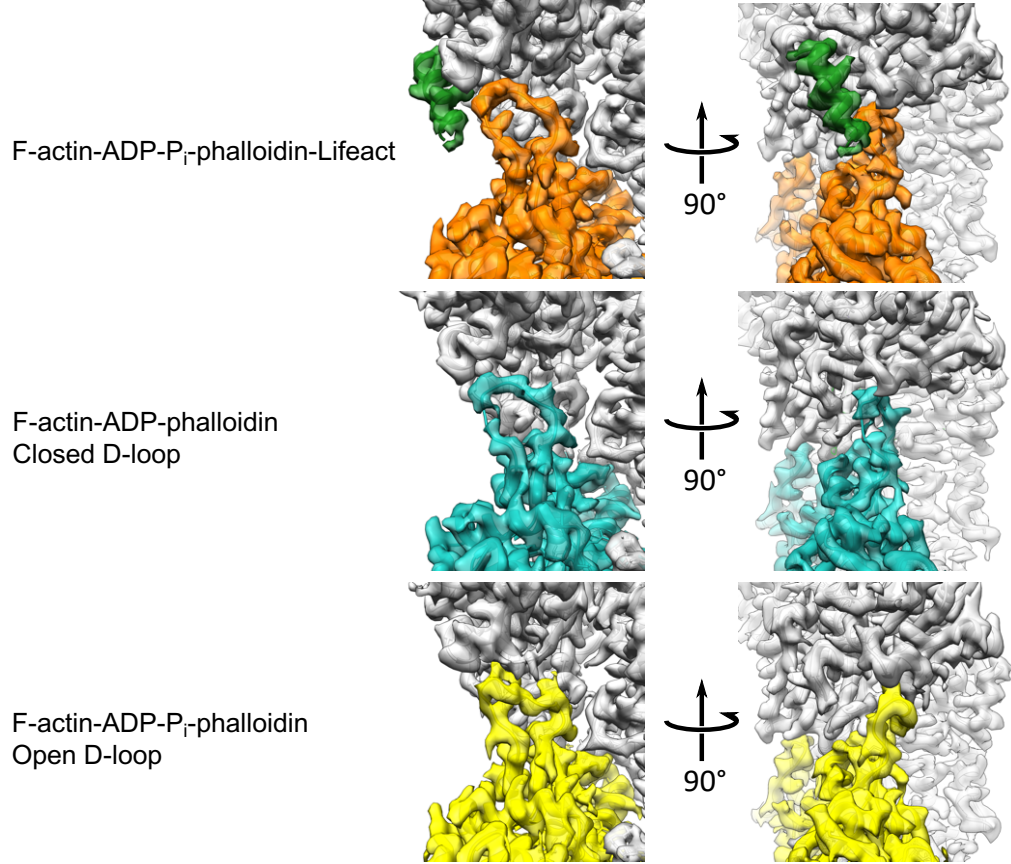

**Figure S3**
